# Supplementary material for: Whole genome re-sequencing of date palms yields insights into diversification of a fruit tree crop
Source: Springer Nature journal article supplement (doi:10.1038/ncomms9824), 2015-11-09
Supplement: 41467_2015_BFncomms9824_MOESM956_ESM.pdf [file 41467_2015_BFncomms9824_MOESM956_ESM.pdf]

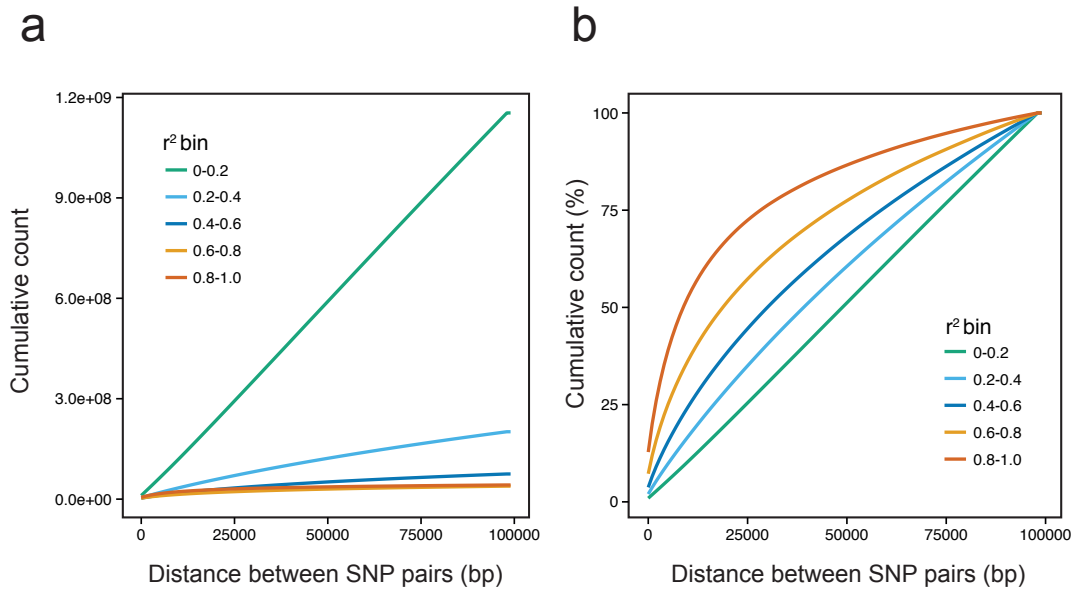

**Supplementary Figure 1.** Summary of linkage disequilibrium in date palm. (a) Cumulative counts of SNP pairs in  $r^2$  bins plotted as function of the physical distance between each pair. (b) Cumulative counts of SNP pairs in  $r^2$  bins as in (a) but plotted as a percentage of the total in each  $r^2$  class. This illustrates the proportion of SNPs in each  $r^2$  class that are found at different physical distances.

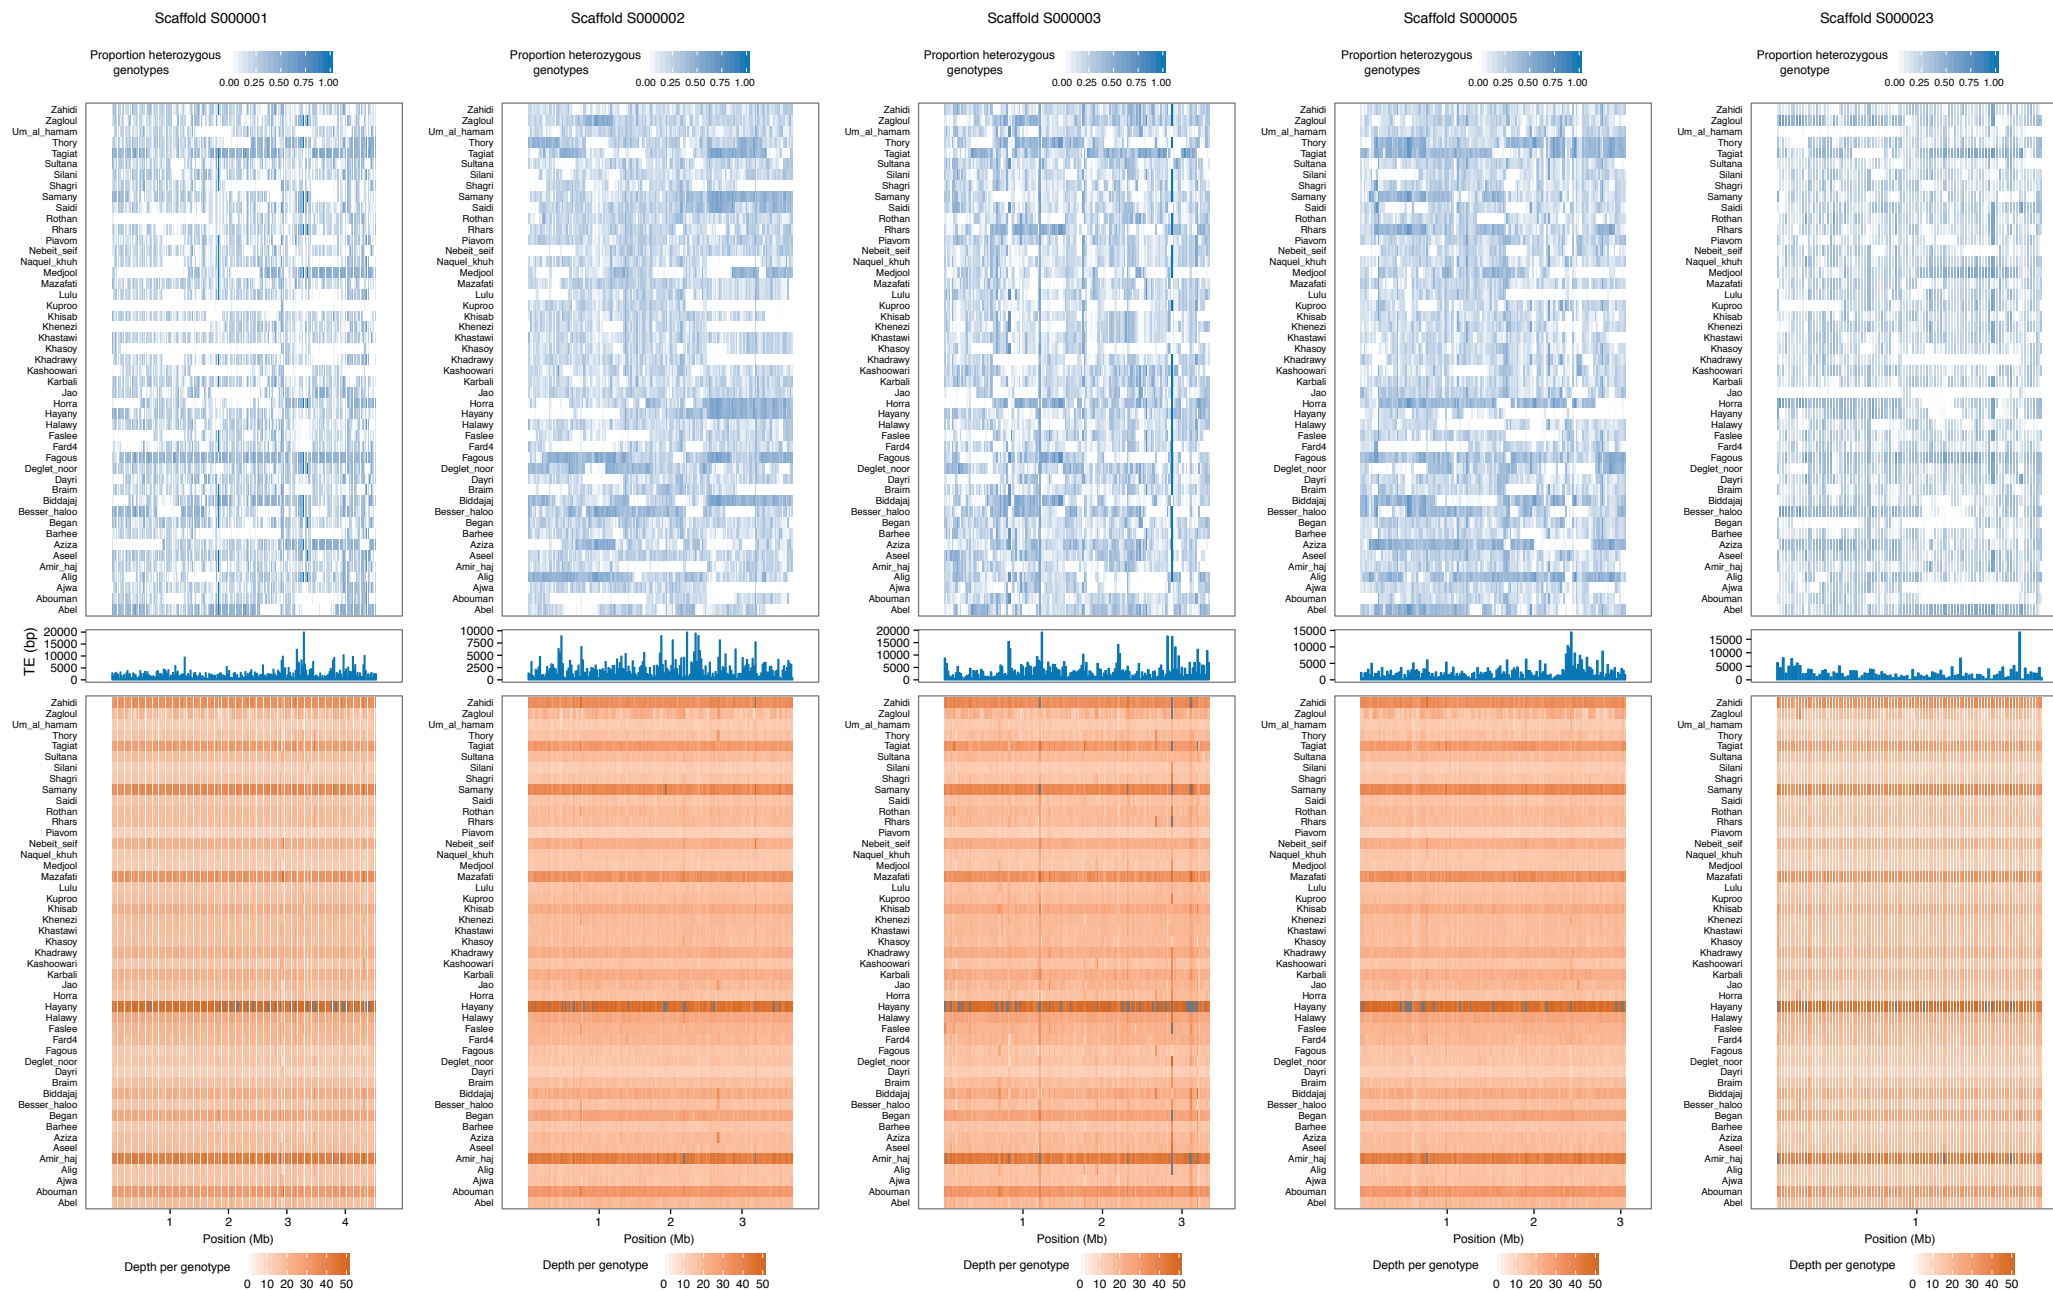

**Supplementary Figure 2.** Runs of homozygosity in date palm samples with 15X or higher coverage. Heatmaps in the upper panel are the proportion of called genotypes that are heterozygous in non-overlapping windows of 20 Kb. The middle panel shows the number of transposable element-related sites in each interval. The lower panel of heatmaps represents the per-genotype coverage (i.e., number of reads per sample at genotyped sites / number of called genotypes) in each interval. Gray in the coverage heatmap represents intervals where the depth per genotype exceeds 50X. Scaffolds 1-3 are the three longest scaffolds in the assembly. Scaffold 23 is also highlighted in Figure 3b. Comparison of panels shows that runs of homozygosity do not correspond to transposable element repeat content or low coverage.

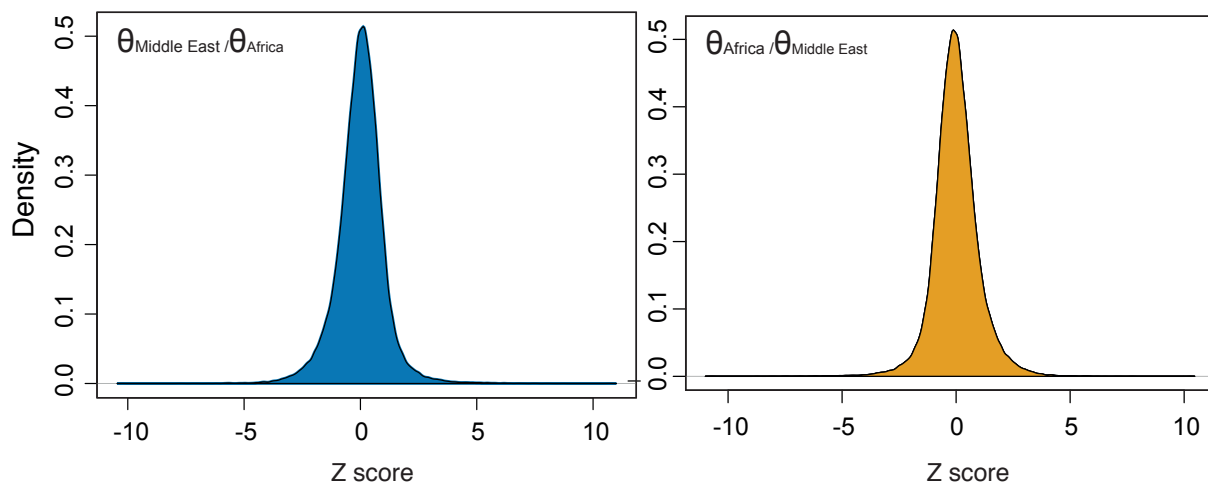

**Supplementary Figure 3.** Distributions of Z scores for  $\log(\theta_{\text{Middle East}} / \theta_{\text{Africa}})$  and  $\log(\theta_{\text{Africa}} / \theta_{\text{Middle East}})$  in genomic windows. The lower tails of each distribution were used to identify candidate sweep regions.

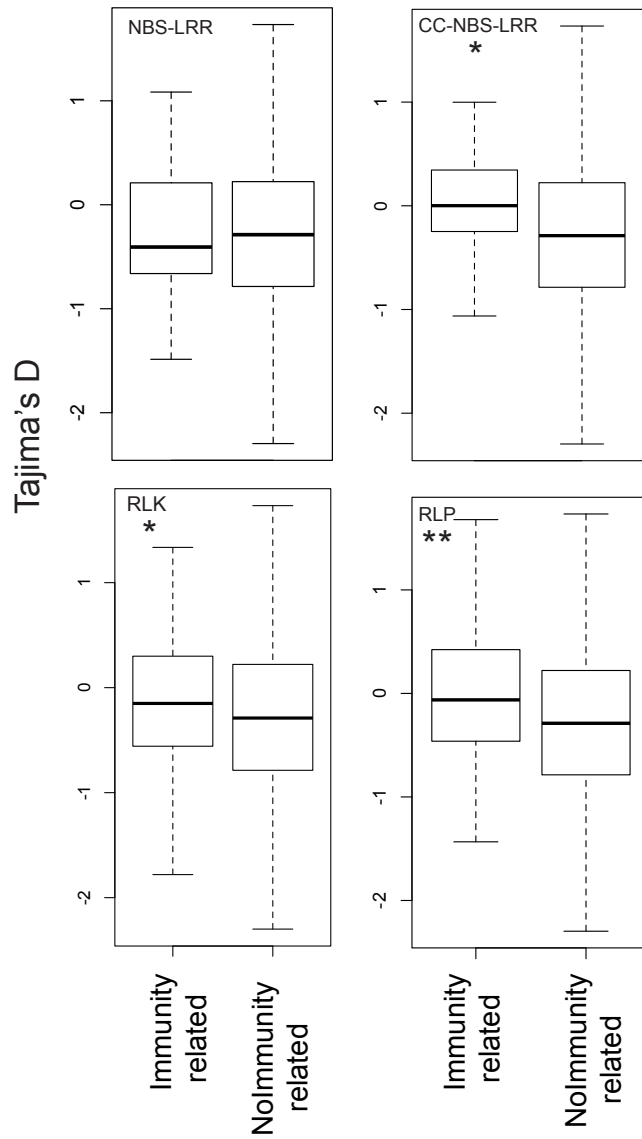

**Supplementary Figure 4.** Tajima's D of disease resistance genes classes compared to the rest of the genome. \*P < 0.01, \*\*P < 0.001

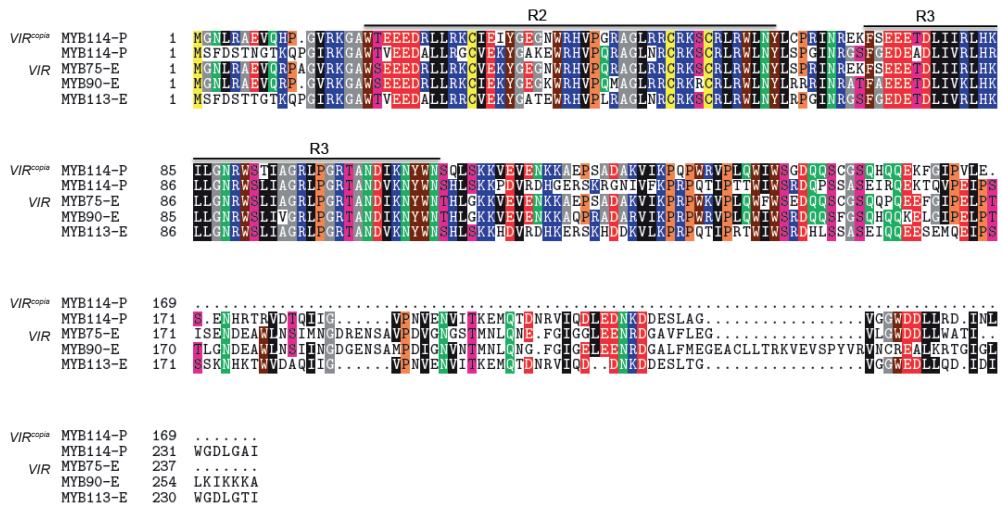

**Supplementary Figure 5.** Alignment of *VIR* and closely-related R2R3 myb-like transcription factors in date palm and oil palm genomes. Oil palm proteins are labeled “E” and date palm “P”. Oil palm *VIR* and date palm *VIR*<sup>copia</sup> (NCBI Gene ID *LOC103717680*) are labeled. Location of R2 and R3 domains are shown. Sequences in the alignment were downloaded from NCBI. The *VIR*<sup>copia</sup> protein is truncated relative to oil palm *VIR*.

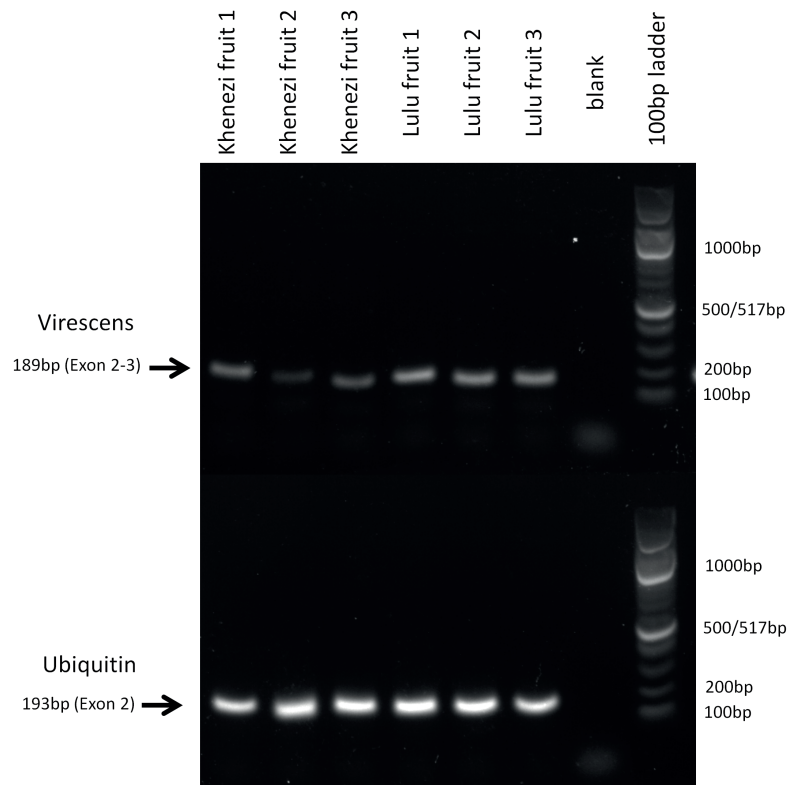

**Supplementary Figure 6.** RT-PCR of *VIR* from 3 replicates of red (cv. Khenezi) and yellow (cv. Lulu) *khalal* stage fruit collected at 105 days post-pollination.

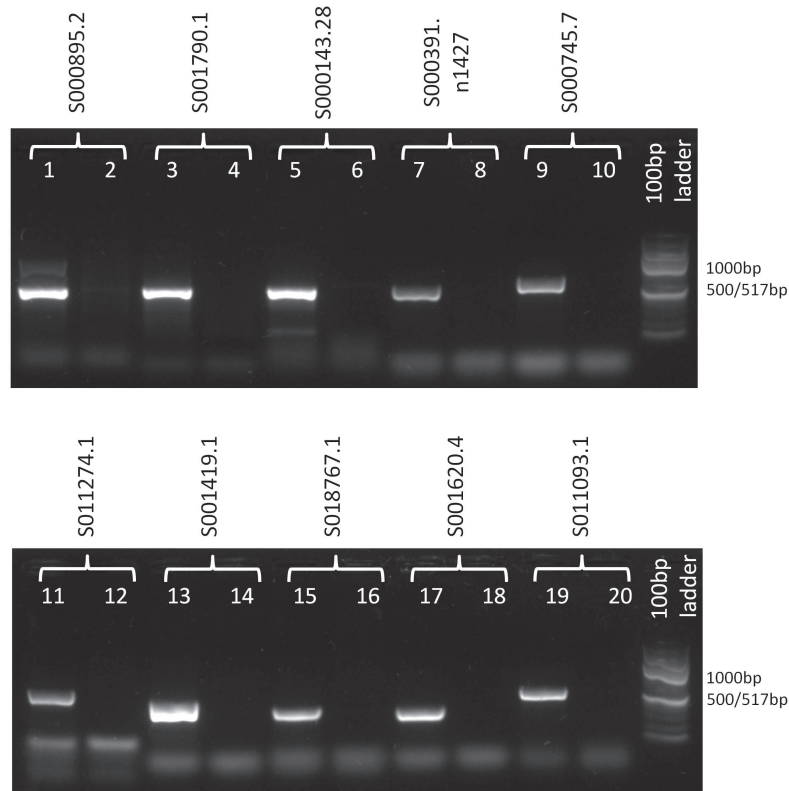

**Supplementary Figure 7.** Gene deletion validation. Agarose gel electrophoresis of PCR products for pairs of samples with and without a predicted gene deletion. Ten genes yielded the result expected for a gene presence/absence polymorphism and three genes failed to validate (*KacstDP.gene.S011041.1*, *KacstDP.gene.S002995.1*, *KacstDP.gene.S000003.134*). Odd numbered lanes contain samples with a predicted insertion allele and even numbered lanes contain samples with a predicted homozygous deletion for each gene. Samples in each lanes are: (1) Chichi (2) Medjool (3) Sultana (4) Ajwa (5) Chichi (6) Thory (7) Chichi (8) Abouman (9) Chichi (10) Barhee (11) Chichi (12) Amir Haj (13) Medjool (14) Lulu (15) Chichi (16) Amir haj (17) Chichi (18) Horra (19) Chichi (20) Rothan. Gene model identifiers have been abbreviated from their standard form with the *KacstDP.gene* prefix.

Supplementary Table 1. Date palm cultivars, their traditional country of origin, and tissue source information.

| Variety      | Origin <sup>a</sup> | tissue | Source                                                   |
|--------------|---------------------|--------|----------------------------------------------------------|
| Thory        | Algeria             | leaf   | Robert Krueger (USDA <sup>b</sup> )                      |
| Rhars        | Algeria             | leaf   | Deborah Thirkhill (ASU <sup>c</sup> )                    |
| Amir haj     | Iraq                | leaf   | Robert Krueger (USDA)                                    |
| Saidi        | Egypt               | leaf   | Robert Krueger (USDA)                                    |
| Zagloul      | Egypt               | leaf   | Nadia Haider (Atomic Energy Commission <sup>d</sup> )    |
| Hayany       | Egypt               | leaf   | Robert Krueger (USDA)                                    |
| Samany       | Egypt               | leaf   | Robert Krueger (USDA)                                    |
| Piavom       | Iran                | fruit  | Joel Malek (Weill Cornell Medical College <sup>e</sup> ) |
| Rabee        | Iran                | fruit  | Joel Malek (Weill Cornell Medical College)               |
| Mazafati     | Iran                | fruit  | Joel Malek (Weill Cornell Medical College)               |
| Kabkab red   | Iran                | leaf   | Nadia Haider (Atomic Energy Commision)                   |
| Tagiat       | Libya               | fruit  | Madhu Subramani (date palm festival, Libya)              |
| Began        | Pakistan            | leaf   | Ghulam Sarwar Markhand (DPRI <sup>f</sup> )              |
| Abel         | Libya               | fruit  | Madhu Subramani (Date palm festival, Libya)              |
| Khadrawy     | Iraq                | leaf   | Nadia Haider (Atomic Energy Commision)                   |
| Khastawi     | Iraq                | leaf   | Deborah Thirkhill (ASU)                                  |
| Zahidi       | Iraq                | leaf   | Robert Krueger (USDA)                                    |
| Um al blaliz | Iraq                | leaf   | Hussam Khierallah (DPRU <sup>g</sup> )                   |
| Um al hamam  | Iraq                | leaf   | Hussam Khierallah (DPRU)                                 |
| Sultana      | Iraq                | leaf   | Abdul Wahab Zayed, Jorik Visser (DPTCL <sup>h</sup> )    |
| Azraq Azraq  | Iraq                | leaf   | Hussam Khierallah (DPRU)                                 |
| Ebrahimi     | Iraq                | leaf   | Hussam Khierallah (DPRU)                                 |
| Ewent ayob   | Iraq                | leaf   | Hussam Khierallah (DPRU)                                 |
| Silani       | Iraq                | leaf   | Hussam Khierallah (DPRU)                                 |
| Medjool      | Morocco             | leaf   | Abdul Wahab Zayed, Jorik Visser (DPTCL)                  |
| Fagous       | Morocco             | fruit  | Youssef Idaghdour (date palm festival, Morocco)          |
| Biddajaj     | Morocco             | fruit  | Youssef Idaghdour (date palm festival, Morocco)          |
| Aziza        | Morocco             | fruit  | Youssef Idaghdour (date palm festival, Morocco)          |
| Braim        | Oman                | leaf   | Deborah Thirkhill (ASU)                                  |
| Kashoowari   | Pakistan            | leaf   | Ghulam Sarwar Markhand (DPRI)                            |



|              |              |       |                                                      |
|--------------|--------------|-------|------------------------------------------------------|
| Naquel khuh  | Pakistan     | leaf  | Ghulam Sarwar Markhand (DPRI)                        |
| Karbali      | Pakistan     | leaf  | Ghulam Sarwar Markhand (DPRI)                        |
| Dedhi        | Pakistan     | leaf  | Ghulam Sarwar Markhand (DPRI)                        |
| Aseel        | Pakistan     | leaf  | Ghulam Sarwar Markhand (DPRI)                        |
| Kuproo       | Pakistan     | leaf  | Ghulam Sarwar Markhand (DPRI)                        |
| Khasoy       | Pakistan     | leaf  | Ghulam Sarwar Markhand (DPRI)                        |
| Chichi       | Saudi Arabia | leaf  | Abdul Wahab Zayed, Jorik Visser (DPTCL)              |
| Hilali       | Saudi Arabia | leaf  | Robert Krueger (USDA)                                |
| Khenezi      | Saudi Arabia | leaf  | Abdul Wahab Zayed, Jorik Visser (DPTCL)              |
| Nebeit seif  | Saudi Arabia | leaf  | Abdul Wahab Zayed, Jorik Visser (DPTCL)              |
| Ajwa         | Saudi Arabia | leaf  | Khaled Masmoudi (ICBA) <sup>i</sup>                  |
| Rothan       | Saudi Arabia | leaf  | Khaled Masmoudi (ICBA)                               |
| Faslee       | Pakistan     | leaf  | Ghulam Sarwar Markhand (DPRI)                        |
| Shagri       | Saudi Arabia | leaf  | Khaled Masmoudi (ICBA)                               |
| Maktoumi     | Iraq         | leaf  | Abdul Wahab Zayed, Jorik Visser (DPTCL)              |
| Dayri        | Iraq         | leaf  | Robert Krueger (USDA)                                |
| Barhee       | Iraq         | leaf  | Robert Krueger (USDA)                                |
| Halawy       | Iraq         | leaf  | Robert Krueger (USDA)                                |
| Khisab       | Iraq         | leaf  | Robert Krueger (USDA)                                |
| Jao          | Sudan        | fruit | Khaled Hazzouri (date palm festival, Abu Dhabi, UAE) |
| Alig         | Tunisia      | leaf  | Nabila Kadri (TCD) <sup>j</sup>                      |
| Besser heloo | Tunisia      | leaf  | Nabila Kadri (TCD)                                   |
| Deglet noor  | Algeria      | leaf  | Nabila Kadri (TCD)                                   |
| Horra        | Tunisia      | leaf  | Robert Krueger (USDA)                                |
| Dibbas       | UAE          | leaf  | Abdul Wahab Zayed, Jorik Visser (DPTCL)              |
| Helwa        | UAE          | leaf  | Abdul Wahab Zayed, Jorik Visser (DPTCL)              |
| Lulu         | UAE          | leaf  | Abdul Wahab Zayed, Jorik Visser (DPTCL)              |
| Nagal        | UAE          | fruit | Khaled Hazzouri (date palm festival, Abu Dhabi, UAE) |
| Abouman      | UAE          | leaf  | Abdul Wahab Zayed, Jorik Visser (DPTCL)              |
| Hiri         | UAE          | leaf  | Abdul Wahab Zayed, Jorik Visser (DPTCL)              |
| Fard4        | UAE          | leaf  | Robert Krueger (USDA)                                |
| Dajwani      | Iraq         | leaf  | Hussam Khierallah (DPRU)                             |

---

<sup>a</sup>country of origin

<sup>b</sup>United States Department of Agriculture, Riverside, CA USA

<sup>c</sup>Arizona State University Date Palm Collection, Arizona State University Tempe, AZ USA

<sup>d</sup>Department of Molecular Biology and Biotechnology, Atomic Energy Commission of Syria, Damascus, Syria

<sup>e</sup>Genomics Core Laboratory, Weill Cornell Medical College in Qatar, Doha, Qatar

<sup>f</sup>Date Palm Research Institute, Sindh, Pakistan

<sup>g</sup>Date Palm Research Unit, College of Agriculture, University of Baghdad, Baghdad, Iraq

<sup>h</sup>Date Palm Tissue Culture Laboratory, United Arab Emirates University, Al-Ain, Abu Dhabi, UAE

<sup>i</sup>International Center for Biosaline Agriculture, Dubai, United Arab Emirates

<sup>j</sup>Technical Center of Dates, Ministry of Agriculture, Kebili, Tunisia

Supplementary Table 2. Sequencing, coverage statistics and the proportion of missing genotypes per sample.

| Variety      | Total reads | Mapped reads | Percent mapped (%) | Read length | Coverage (X) | Fraction missing genotypes |
|--------------|-------------|--------------|--------------------|-------------|--------------|----------------------------|
| Chichi       | 109321274   | 86723531     | 79.3290526         | 93          | 14.44922723  | 0.0021                     |
| Medjool      | 112835840   | 103516262    | 91.740587          | 93          | 17.24710669  | 0.0023                     |
| Alig         | 131317182   | 119286627    | 90.8385523         | 93          | 19.8746471   | 0.0020                     |
| Besser_haloo | 143153760   | 129533822    | 90.4857979         | 93          | 21.58195829  | 0.0035                     |
| Dibbas       | 64385430    | 57440736     | 89.2138734         | 93          | 9.570346564  | 0.0072                     |
| Kashoowari   | 132542886   | 118890896    | 89.6999451         | 93          | 19.80871342  | 0.0012                     |
| Maktoumi     | 94760558    | 82105015     | 86.6447146         | 93          | 13.67972458  | 0.0022                     |
| Naquel_khuh  | 128138114   | 112873686    | 88.0875194         | 93          | 18.80617081  | 0.0006                     |
| Piavom       | 101150170   | 91315838     | 90.2774934         | 93          | 15.21436314  | 0.0011                     |
| Rabee        | 87588432    | 72963286     | 83.3024229         | 93          | 12.15659795  | 0.0025                     |
| Helwa        | 93762992    | 79854462     | 85.1662903         | 93          | 13.30475424  | 0.0024                     |
| Hilali       | 41717804    | 36050413     | 86.4149345         | 93          | 6.006450651  | 0.0271                     |
| Hiri         | 37248078    | 30085305     | 80.770087          | 93          | 5.012588894  | 0.0539                     |
| Dedhi        | 79820616    | 71996753     | 90.1981927         | 93          | 11.99556144  | 0.0021                     |

|             |           |           |            |    |             |        |
|-------------|-----------|-----------|------------|----|-------------|--------|
| Saidi       | 133266564 | 119227559 | 89.4654709 | 93 | 19.86480569 | 0.0011 |
| Khenezi     | 168550808 | 145451032 | 86.2950666 | 93 | 24.23396497 | 0.0007 |
| Khadrawy    | 173379372 | 155991281 | 89.9710728 | 93 | 25.99010257 | 0.0004 |
| Lulu        | 142356434 | 128516000 | 90.2776196 | 93 | 21.41237638 | 0.0007 |
| Aseel       | 159213998 | 134491532 | 84.4721781 | 93 | 22.40797491 | 0.0010 |
| Sultana     | 152396552 | 136799671 | 89.7655946 | 93 | 22.7925398  | 0.0007 |
| Horra       | 147138214 | 127966502 | 86.97027   | 93 | 21.32082313 | 0.0026 |
| Kuproo      | 145236312 | 132007111 | 90.891258  | 93 | 21.99403923 | 0.0007 |
| Braim       | 141664676 | 129201530 | 91.2023616 | 93 | 21.52659427 | 0.0005 |
| Deglet_noor | 130029030 | 116134272 | 89.3141109 | 93 | 19.34942531 | 0.0015 |
| Fard4       | 163481700 | 146318457 | 89.5014286 | 93 | 24.37848885 | 0.0009 |
| Thory       | 139638242 | 123414451 | 88.381556  | 93 | 20.56239438 | 0.0024 |
| Khastawi    | 154069874 | 136426128 | 88.5482181 | 93 | 22.73030285 | 0.0005 |
| Rhars       | 151860304 | 136458378 | 89.8578328 | 93 | 22.73567611 | 0.0008 |
| Khasoy      | 159291734 | 123975711 | 77.8293436 | 93 | 20.65590733 | 0.0012 |
| Dayri       | 99972410  | 90514726  | 90.5397059 | 93 | 15.08088784 | 0.0021 |
| Barhee      | 130291328 | 104754767 | 80.4004139 | 93 | 17.45345715 | 0.0012 |
| Zahidi      | 281092688 | 238952154 | 85.0083137 | 93 | 39.81242382 | 0.0001 |

|              |           |           |            |     |             |        |
|--------------|-----------|-----------|------------|-----|-------------|--------|
| Amir_haj     | 397297466 | 281061091 | 70.7432378 | 93  | 46.8283005  | 0.0004 |
| Hayany       | 407478644 | 317739714 | 77.9770225 | 93  | 52.93941881 | 0.0004 |
| Samany       | 289624384 | 243111732 | 83.9403536 | 93  | 40.50546164 | 0.0006 |
| Halawy       | 162595060 | 155428265 | 95.5922431 | 101 | 28.1239355  | 0.0004 |
| Khisab       | 165194552 | 157467769 | 95.3226163 | 101 | 28.49297313 | 0.0006 |
| Abouman      | 236015032 | 217220519 | 92.0367305 | 93  | 36.19166105 | 0.0004 |
| Jao          | 155404282 | 128714348 | 82.8254835 | 93  | 21.44542365 | 0.0020 |
| Abel         | 158159836 | 126359518 | 79.8935565 | 93  | 21.05307945 | 0.0028 |
| Tagiat       | 250752326 | 190235490 | 75.8658925 | 93  | 31.69561699 | 0.0015 |
| Karbali      | 189760940 | 152368475 | 80.2949622 | 93  | 25.38649768 | 0.0003 |
| Zagloul      | 155332522 | 141068499 | 90.8171046 | 93  | 23.50378005 | 0.0022 |
| Kabkab (red) | 107932054 | 47320407  | 43.8427745 | 93  | 7.884172907 | 0.0453 |
| Mazafati     | 290561316 | 210195293 | 72.3411141 | 93  | 35.02117034 | 0.0003 |
| Began        | 211166858 | 174433736 | 82.6046936 | 93  | 29.06284672 | 0.0005 |
| Faslee       | 168656478 | 145539146 | 86.293244  | 93  | 24.24864587 | 0.0006 |
| Biddajaj     | 215359992 | 152892528 | 70.9939328 | 93  | 25.47381148 | 0.0024 |
| Fagous       | 156801560 | 102742463 | 65.5238781 | 93  | 17.11818208 | 0.0023 |
| Aziza        | 163627344 | 119725731 | 73.1697576 | 93  | 19.94780739 | 0.0027 |

|              |           |           |            |    |             |        |
|--------------|-----------|-----------|------------|----|-------------|--------|
| Nebeit_seif  | 183511382 | 157268890 | 85.6998014 | 93 | 26.20296824 | 0.0005 |
| Ajwa         | 126140454 | 114039697 | 90.4069181 | 93 | 19.00044286 | 0.0018 |
| Um_al_hamam  | 105133034 | 95326359  | 90.6721278 | 93 | 15.8825662  | 0.0019 |
| Um_al_blaliz | 75838196  | 69893058  | 92.1607603 | 93 | 11.64505948 | 0.0023 |
| Ewent_ayob   | 69893862  | 64821218  | 92.7423613 | 93 | 10.80002737 | 0.0027 |
| Azraq_azraq  | 73139580  | 67832930  | 92.7444894 | 93 | 11.30181634 | 0.0021 |
| Ebrahimi     | 76075150  | 70979772  | 93.3021782 | 93 | 11.82611966 | 0.0023 |
| Dajwani      | 67058744  | 62476457  | 93.1667569 | 93 | 10.4093608  | 0.0038 |
| Silani       | 102840866 | 96168201  | 93.51166   | 93 | 16.02282763 | 0.0013 |
| Nagal        | 87540390  | 79122520  | 90.3840159 | 93 | 13.18280353 | 0.0362 |
| Shagri       | 116838766 | 107420563 | 91.9391454 | 93 | 17.89761217 | 0.0012 |

---

Supplementary Table 3. SNP validation by PCR and Sanger sequencing.

| Scaffold | Position | SNP effect  | Reference<br>Illumina | Alternative<br>Illumina | Reference<br>Sanger | Alternative<br>Sanger | Reference<br>Cultivar | Alternative<br>Cultivar |
|----------|----------|-------------|-----------------------|-------------------------|---------------------|-----------------------|-----------------------|-------------------------|
| S000092  | 187705   | Stop Gained | C/C                   | A/A                     | C/C                 | A/A                   | Azraq azraq           | Biddajaj                |
| S000368  | 193868   | Stop Gained | C/C                   | A/A                     | C/C                 | A/A                   | Khastawi              | Rothan                  |
| S000441  | 11861    | Stop Gained | T/T                   | A/A                     | T/T                 | A/A                   | Shagri                | Horra                   |
| S000039  | 216873   | Intron      | C/C                   | G/G                     | C/C                 | G/G                   | Thory                 | Biddajaj                |
| S000079  | 195726   | Intron      | A/A                   | G/G                     | A/A                 | G/G                   | Thory                 | Dajwani                 |
| S000161  | 474552   | Downstream  | A/A                   | G/G                     | A/A                 | G/G                   | Abouman               | Um al hamam             |
| S000188  | 145368   | Intergenic  | C/C                   | A/A                     | NA                  | A/A                   | NA                    | Braim                   |
| S000223  | 82074    | Downstream  | G/G                   | T/T                     | G/G                 | T/T                   | Lulu                  | Thory                   |
| S000253  | 376826   | Intergenic  | T/T                   | C/C                     | T/T                 | C/C                   | Azraq azraq           | Dajwani                 |
| S000287  | 188920   | Intron      | C/C                   | T/T                     | C/C                 | T/T                   | Khastawi              | Abouman                 |
| S000528  | 177537   | Intron      | A/A                   | G/G                     | A/A                 | G/G                   | Um al blaliz          | Biddajaj                |
| S001489  | 6575     | Downstream  | C/C                   | T/T                     | C/C                 | T/T                   | Rothan                | Khastawi                |
| S002461  | 10593    | Intergenic  | T/T                   | G/G                     | T/T                 | T/T                   | Khastawi              | Dajwani                 |
| S007357  | 2185     | Intergenic  | A/A                   | G/G                     | A/A                 | G/G                   | Khastawi              | Rothan                  |
| S000613  | 130775   | Intergenic  | C/C                   | T/T                     | C/C                 | T/T                   | Rothan, Biddajaj      | Braim                   |
| S000641  | 81057    | Upstream    | A/A                   | G/G                     | A/A                 | G/G                   | Braim                 | Ebrahimi                |
| S000648  | 145677   | Downstream  | A/A                   | G/G                     | A/A                 | G/G                   | Rabee, Dajwani        | Biddajaj                |
| S000013  | 1255178  | Upstream    | C/C                   | T/T                     | C/C                 | T/T                   | Rabee                 | Biddajaj                |
| S000021  | 1142712  | Downstream  | A/A                   | T/T                     | A/A                 | T/T                   | Thory                 | Jao                     |

Supplementary Table 4. Summary of nucleotide diversity in cultivated date palm. Diversity was estimated as the mean  $\pm$  S.E in 5 Kb windows. Admixed individuals identified by STRUCTURE are not considered in the estimates for each subpopulation.

|                          | N <sup>a</sup> | $\pi$                | $\theta_w$            | Tajima's D          |
|--------------------------|----------------|----------------------|-----------------------|---------------------|
| All                      | 62             | 0.00920 $\pm$ .00002 | 0.01000 $\pm$ 0.00003 | -0.271 $\pm$ 0.0038 |
| Africa                   | 10             | 0.01080 $\pm$ .00003 | 0.009 $\pm$ 0.00003   | 0.401 $\pm$ 0.0033  |
| Middle East <sup>b</sup> | 42             | 0.00810 $\pm$ .00002 | 0.007 $\pm$ 0.00002   | 0.045 $\pm$ 0.0033  |

<sup>a</sup>Number of diploid genome sequences

<sup>b</sup>Includes samples from Pakistan



Supplementary Table 5. Summary of STRUCTURE results using the Evanno method from K=1 to K=10 based on 14 replicate runs per K.

| K  | Reps | MeanLnP(K)   | Stdev       | LnP(K)       | Ln'(K)      | $\Delta K$ |
|----|------|--------------|-------------|--------------|-------------|------------|
| 1  | 14   | -1006411.371 | 1835.1114   | NA           | NA          | NA         |
| 2  | 14   | -935745.4143 | 74.2193     | 70665.95714  | 63572.97857 | 856.555898 |
| 3  | 14   | -928652.4357 | 2775.7607   | 7092.978571  | 953537.1143 | 343.522814 |
| 4  | 14   | -1875096.571 | 1756104.856 | -946444.1357 | 581599.9786 | 0.331188   |
| 5  | 14   | -2239940.729 | 1762370.075 | -364844.1571 | 3242538.507 | 1.839874   |
| 6  | 14   | -5847323.393 | 13259870.92 | -3607382.664 | 24180944.65 | 1.823618   |
| 7  | 14   | -33635650.71 | 20176130.98 | -27788327.31 | 35744053.78 | 1.771601   |
| 8  | 14   | -25679924.24 | 28894922.58 | 7955726.464  | 27306432.46 | 0.945025   |
| 9  | 14   | -45030630.24 | 24391713.23 | -19350705.99 | 19374411.16 | 0.794303   |
| 10 | 14   | -45006925.06 | 27398419.21 | 23705.17143  | NA          | NA         |

Supplementary Table 6. Summary of statistics derived from individual genome sequences. Single genome estimates of  $\theta$  are based on the method of Haubold et al. (2010) and  $F_{\text{ind}}$  estimates were obtained from ngsF (Vieira et al. 2013).  $F_{\text{ind}}$  was not obtained for admixed individuals as the estimate is based on allele frequencies in Africa or the Middle East.

| Sample       | $\theta^a$                 | $\varepsilon^b$            | $-\log(L)^c$ | $^dF_{\text{ind}}$ |
|--------------|----------------------------|----------------------------|--------------|--------------------|
| Chichi       | 5.38e-03<5.39e-03<5.40e-03 | 2.88e-03<2.88e-03<2.88e-03 | 7.42E+08     | 0.004098           |
| Medjool      | 7.34e-03<7.35e-03<7.36e-03 | 3.10e-03<3.10e-03<3.10e-03 | 7.81E+08     | 0.006179           |
| Alig         | 7.38e-03<7.40e-03<7.42e-03 | 2.07e-03<2.07e-03<2.07e-03 | 1.55E+08     | 0.0002             |
| Besser_haloo | 7.49e-03<7.50e-03<7.51e-03 | 3.12e-03<3.12e-03<3.12e-03 | 8.12E+08     | 0.002925           |
| Dibbas       | 5.33e-03<5.34e-03<5.35e-03 | 2.94e-03<2.94e-03<2.94e-03 | 6.30E+08     | 0.002772           |
| Kashoowari   | 6.16e-03<6.17e-03<6.18e-03 | 3.09e-03<3.09e-03<3.09e-03 | 8.09E+08     | 0.021529           |
| Maktoumi     | 5.65e-03<5.66e-03<5.67e-03 | 3.15e-03<3.15e-03<3.15e-03 | 7.33E+08     | 0.00113            |
| Naquel_khuh  | 6.13e-03<6.14e-03<6.14e-03 | 2.86e-03<2.86e-03<2.86e-03 | 8.02E+08     | 0.000249           |
| Piavom       | 6.31e-03<6.32e-03<6.33e-03 | 3.01e-03<3.01e-03<3.01e-03 | 7.61E+08     | 0.000122           |
| Rabee        | 6.03e-03<6.04e-03<6.05e-03 | 2.83e-03<2.83e-03<2.83e-03 | 7.15E+08     | NA                 |
| Helwa        | 5.47e-03<5.48e-03<5.49e-03 | 2.54e-03<2.54e-03<2.54e-03 | 7.14E+08     | 0.008344           |
| Hilali       | 4.74e-03<4.75e-03<4.76e-03 | 2.68e-03<2.68e-03<2.68e-03 | 4.55E+08     | 0.016391           |
| Hiri         | 4.64e-03<4.65e-03<4.66e-03 | 3.22e-03<3.22e-03<3.23e-03 | 3.73E+08     | 0.023636           |
| Dedhi        | 5.41e-03<5.42e-03<5.43e-03 | 3.09e-03<3.09e-03<3.10e-03 | 7.22E+08     | 0.037501           |

|             |                            |                            |          |          |
|-------------|----------------------------|----------------------------|----------|----------|
| Saidi       | 7.35e-03<7.36e-03<7.37e-03 | 3.45e-03<3.45e-03<3.45e-03 | 8.16E+08 | NA       |
| Khenezi     | 6.26e-03<6.29e-03<6.29e-03 | 3.59e-03<3.59e-03<3.59e-03 | 8.60E+08 | 0.009427 |
| Khadrawy    | 6.48e-03<6.49e-03<6.50e-03 | 3.07e-03<3.07e-03<3.08e-03 | 8.69E+08 | 0.000468 |
| Lulu        | 6.46e-03<6.46e-03<6.47e-03 | 3.35e-03<3.35e-03<3.35e-03 | 8.29E+08 | 0.00021  |
| Aseel       | 7.88e-03<7.89e-03<7.90e-03 | 3.59e-03<3.59e-03<3.59e-03 | 8.60E+08 | NA       |
| Sultana     | 6.00e-03<6.01e-03<6.02e-03 | 3.30e-03<3.30e-03<3.30e-03 | 8.43E+08 | 0.01177  |
| Horra       | 7.98e-03<7.99e-03<8.00e-03 | 3.32e-03<3.32e-03<3.32e-03 | 8.21E+08 | 0.009218 |
| Kuproo      | 5.99e-03<6.00e-03<6.01e-03 | 3.36e-03<3.36e-03<3.36e-03 | 8.40E+08 | 0.053323 |
| Braim       | 6.55e-03<6.56e-03<6.57e-03 | 3.48e-03<3.48e-03<3.48e-03 | 8.40E+08 | 0.000482 |
| Deglet_noor | 7.89e-03<7.89e-03<7.90e-03 | 3.19e-03<3.19e-03<3.19e-03 | 8.06E+08 | NA       |
| Fard4       | 6.22e-03<6.23e-03<6.24e-03 | 3.30e-03<3.30e-03<3.30e-03 | 8.60E+08 | 0.045325 |
| Thory       | 7.78e-03<7.79e-03<7.80e-03 | 3.15e-03<3.15e-03<3.15e-03 | 8.08E+08 | 0.000188 |
| Khastawi    | 6.13e-03<6.13e-03<6.14e-03 | 3.39e-03<3.39e-03<3.39e-03 | 8.44E+08 | 0.000478 |
| Rhars       | 8.10e-03<8.11e-03<8.12e-03 | 3.40e-03<3.40e-03<3.40e-03 | 8.55E+08 | NA       |
| Khasoy      | 5.75e-03<5.75e-03<5.76e-03 | 3.38e-03<3.38e-03<3.38e-03 | 8.24E+08 | 0.03509  |
| Dayri       | 6.35e-03<6.36e-03<6.37e-03 | 3.41e-03<3.41e-03<3.41e-03 | 7.62E+08 | 0.002744 |
| Barhee      | 6.27e-03<6.27e-03<6.28e-03 | 3.47e-03<3.47e-03<3.47e-03 | 7.98E+08 | 0.003529 |
| Zahidi      | 7.38e-03<7.39e-03<7.40e-03 | 2.75e-03<2.75e-03<2.75e-03 | 9.42E+08 | 0.000013 |

|            |                            |                            |          |          |
|------------|----------------------------|----------------------------|----------|----------|
| Amir_haj   | 7.00e-03<7.01e-03<7.02e-03 | 3.78e-03<3.78e-03<3.78e-03 | 1.04E+09 | 0.000179 |
| Hayany     | 7.95e-03<7.96e-03<7.96e-03 | 3.78e-03<3.78e-03<3.78e-03 | 1.09E+09 | NA       |
| Samany     | 7.71e-03<7.72e-03<7.73e-03 | 3.35e-03<3.36e-03<3.36e-03 | 9.77E+08 | NA       |
| Halawy     | 6.77e-03<6.78e-03<6.79e-03 | 2.58e-03<2.58e-03<2.58e-03 | 8.56E+08 | 0.000316 |
| Khisab     | 5.83e-03<5.90e-03<5.98e-03 | 2.11e-03<2.12e-03<2.13e-03 | 6.91E+06 | 0.005689 |
| Abouman    | 6.51e-03<6.51e-03<6.52e-03 | 4.27e-03<4.27e-03<4.27e-03 | 1.00E+09 | 0.001252 |
| Jao        | 6.52e-03<6.53e-03<6.54e-03 | 3.32e-03<3.32e-03<3.32e-03 | 8.31E+08 | NA       |
| Abel       | 7.39e-03<7.40e-03<7.41e-03 | 3.22e-03<3.22e-03<3.22e-03 | 8.18E+08 | 0.003502 |
| Tagiat     | 8.03e-03<8.04e-03<8.04e-03 | 3.68e-03<3.68e-03<3.68e-03 | 9.35E+08 | 0.000012 |
| Karbali    | 7.02e-03<7.03e-03<7.04e-03 | 3.13e-03<3.13e-03<3.13e-03 | 8.72E+08 | 0.000019 |
| Zagloul    | 7.55e-03<7.55e-03<7.60e-03 | 3.36e-03<3.36e-03<3.36e-03 | 8.46E+08 | NA       |
| Kabkab red | 5.17e-03<5.18e-03<5.19e-03 | 4.26e-03<4.26e-03<4.26e-03 | 5.36E+08 | 0.004839 |
| Mazafati   | 6.96e-03<6.97e-03<6.97e-03 | 3.48e-03<3.48e-03<3.48e-03 | 9.56E+08 | 0.001655 |
| Began      | 7.33e-03<7.34e-03<7.35e-03 | 3.57e-03<3.57e-03<3.57e-03 | 9.19E+08 | NA       |
| Faslee     | 6.94e-03<6.95e-03<6.96e-03 | 3.13e-03<3.13e-03<3.13e-03 | 8.61E+08 | 0.001396 |
| Biddajaj   | 7.41e-03<7.42e-03<7.43e-03 | 3.84e-03<3.84e-03<3.84e-03 | 8.81E+08 | 0.004395 |
| Fagous     | 8.06e-03<8.07e-03<8.08e-03 | 3.75e-03<3.75e-03<3.75e-03 | 7.99E+08 | 0        |
| Aziza      | 7.43e-03<7.44e-03<7.45e-03 | 2.98e-03<2.98e-03<2.98e-03 | 8.03E+08 | 0.000083 |

|              |                            |                            |          |          |
|--------------|----------------------------|----------------------------|----------|----------|
| Nebeit_seif  | 6.13e-03<6.14e-03<6.14e-03 | 3.15e-03<3.15e-03<3.15e-03 | 8.77E+08 | 0.010226 |
| Ajwa         | 5.92e-03<5.93e-03<5.94e-03 | 2.84e-03<2.84e-03<2.84e-03 | 7.84E+08 | 0.005948 |
| Um_al_hamam  | 5.86e-03<5.87e-03<5.88e-03 | 5.07e-03<5.07e-03<5.07e-03 | 8.19E+08 | 0.003752 |
| Um_al_blaliz | 6.05e-03<6.06e-03<6.06e-03 | 4.09e-03<4.09e-03<4.09e-03 | 7.42E+08 | 0.000212 |
| Ewent_ayob   | 5.85e-03<5.86e-03<5.87e-03 | 3.81e-03<3.81e-03<3.81e-03 | 7.16E+08 | 0.000885 |
| Azraq_azraq  | 5.58e-03<5.59e-03<5.60e-03 | 3.29e-03<3.29e-03<3.29e-03 | 7.14E+08 | 0.000816 |
| Ebrahimi     | 5.81e-03<5.81e-03<5.82e-03 | 4.04e-03<4.04e-03<4.04e-03 | 7.45E+08 | 0.000739 |
| Dajwani      | 5.39e-03<5.40e-03<5.40e-03 | 3.48e-03<3.48e-03<3.48e-03 | 6.96E+08 | 0.124829 |
| Silani       | 6.46e-03<6.47e-03<6.47e-03 | 4.30e-03<4.30e-03<4.30e-03 | 8.12E+08 | 0.000163 |
| Nagal        | 5.79e-03<5.80e-03<5.80e-03 | 4.99e-03<4.99e-03<4.99e-03 | 7.16E+08 | 0.018994 |
| Rothan       | 6.54e-03<6.54e-03<6.55e-03 | 3.57e-03<3.57e-03<3.57e-03 | 8.33e+08 | 0.022961 |
| Shagri       | 6.47e-03<6.48e-03<6.49e-03 | 3.50e-03<3.50e-03<3.50e-03 | 8.03E+08 | 0.011398 |

---

<sup>a</sup>population mutation parameter estimate with 95% confidence intervals

<sup>b</sup>Sequencing error rate estimate with 95% confidence intervals

<sup>c</sup>Negative log likelihood

<sup>d</sup>Inbreeding coefficient

Supplementary Table 7. Genomic regions with outlier Z scores for the statistic  $\theta_{\text{Middle East}}/\theta_{\text{Africa}}$ .

| Scaffold | Start position (bp) | End position (bp) | $\theta$ , North |                        |                | Transcript IDa          |
|----------|---------------------|-------------------|------------------|------------------------|----------------|-------------------------|
|          |                     |                   | Africa           | $\theta$ , Middle East | Z, Middle East |                         |
| S000007  | 285000              | 290000            | 0.010333459      | 0.000488091            | -9.160032915   | KacstDP.mRNA.S000007.21 |
| S000007  | 280000              | 285000            | 0.010202121      | 0.001042352            | -7.016693611   |                         |
| S000013  | 1745000             | 1750000           | 0.007419217      | 0.001144429            | -5.872277856   |                         |
| S000013  | 1750000             | 1755000           | 0.006669986      | 0.001131341            | -5.608491336   |                         |
| S000016  | 1505000             | 1510000           | 0.01911666       | 0.003925687            | -5.077339952   | KacstDP.mRNA.S000016.98 |
| S000016  | 1510000             | 1515000           | 0.01517932       | 0.00181823             | -6.574856212   |                         |
| S000016  | 1515000             | 1520000           | 0.014688329      | 0.002965084            | -5.124925382   |                         |
| S000019  | 1240000             | 1245000           | 0.013653392      | 0.001789733            | -6.324417324   | KacstDP.mRNA.S000019.94 |
| S000019  | 1250000             | 1255000           | 0.01155726       | 0.001519166            | -6.316724241   |                         |
| S000019  | 1255000             | 1260000           | 0.012431234      | 0.002118321            | -5.595640812   |                         |
| S000019  | 1245000             | 1250000           | 0.01325772       | 0.002300245            | -5.545569116   |                         |
| S000021  | 975000              | 980000            | 0.007204438      | 0.001264778            | -5.512888682   | KacstDP.mRNA.S000021.85 |
| S000021  | 980000              | 985000            | 0.011346868      | 0.001416247            | -6.460569354   | KacstDP.mRNA.S000021.86 |
| S000021  | 985000              | 990000            | 0.009339509      | 0.001714485            | -5.388821552   | KacstDP.mRNA.S000021.87 |
| S000021  | 990000              | 995000            | 0.016643426      | 0.00254856             | -5.892610753   |                         |
| S000021  | 995000              | 1000000           | 0.008089633      | 0.00151755             | -5.328663379   |                         |
| S000021  | 1000000             | 1005000           | 0.009887375      | 0.001825391            | -5.37305203    |                         |
| S000021  | 1005000             | 1010000           | 0.014940394      | 0.001457026            | -7.146026723   |                         |
| S000021  | 1010000             | 1015000           | 0.012791829      | 0.002304589            | -5.440947122   |                         |
| S000025  | 985000              | 990000            | 0.027351653      | 0.002608305            | -7.208269652   | KacstDP.mRNA.S000025.94 |
| S000025  | 990000              | 995000            | 0.03204479       | 0.002754162            | -7.497034829   | KacstDP.mRNA.S000025.95 |
| S000025  | 995000              | 1000000           | 0.016915233      | 0.00229122             | -6.233320963   | KacstDP.mRNA.S000025.96 |
| S000025  | 1020000             | 1025000           | 0.002768142      | 0.000521086            | -5.319024487   |                         |

|         |         |         |             |             |              |                         |
|---------|---------|---------|-------------|-------------|--------------|-------------------------|
| S000025 | 1050000 | 1055000 | 0.004160301 | 0.000832173 | -5.150357063 |                         |
| S000045 | 340000  | 345000  | 0.006573053 | 0.001256989 | -5.275249844 | KacstDP.mRNA.S000045.30 |
| S000045 | 345000  | 350000  | 0.008593463 | 0.001791899 | -5.034855147 | KacstDP.mRNA.S000045.31 |
| S000045 | 350000  | 355000  | 0.006962083 | 0.001404903 | -5.125932649 |                         |
| S000056 | 730000  | 735000  | 0.02159655  | 0.003772729 | -5.526596603 | KacstDP.mRNA.S000056.70 |
| S000056 | 735000  | 740000  | 0.008928676 | 0.001585158 | -5.481728383 |                         |
| S000056 | 740000  | 745000  | 0.014487533 | 0.002926808 | -5.122781297 |                         |
| S000068 | 795000  | 800000  | 0.013834093 | 0.001990454 | -6.065646181 | KacstDP.mRNA.S000068.46 |
| S000068 | 800000  | 805000  | 0.014034309 | 0.00269525  | -5.263456369 | KacstDP.mRNA.S000068.47 |
| S000068 | 805000  | 810000  | 0.009564264 | 0.001980785 | -5.053786427 |                         |
| S000078 | 610000  | 615000  | 0.008474436 | 0.00172321  | -5.104693907 | KacstDP.mRNA.S000078.47 |
| S000078 | 620000  | 625000  | 0.009875731 | 0.001746217 | -5.492964421 |                         |
| S000080 | 405000  | 410000  | 0.009679794 | 0.001445236 | -5.962843316 | KacstDP.mRNA.S000080.35 |
| S000080 | 410000  | 415000  | 0.009390939 | 0.001930863 | -5.073893485 |                         |
| S000117 | 340000  | 345000  | 0.015353947 | 0.001655957 | -6.866338333 | KacstDP.mRNA.S000117.25 |
| S000117 | 350000  | 355000  | 0.012124994 | 0.002223995 | -5.39110755  | KacstDP.mRNA.S000117.26 |
|         |         |         |             |             |              | KacstDP.mRNA.S000117.27 |
| S000131 | 430000  | 435000  | 0.007256079 | 0.00146976  | -5.115459452 | KacstDP.mRNA.S000131.13 |
| S000131 | 435000  | 440000  | 0.007316205 | 0.001499648 | -5.082458519 |                         |
| S000131 | 450000  | 455000  | 0.007606502 | 0.001563297 | -5.075082828 |                         |
| S000142 | 600000  | 605000  | 0.006809411 | 0.00119912  | -5.504324097 | KacstDP.mRNA.S000142.45 |
| S000142 | 610000  | 615000  | 0.005760134 | 0.001127012 | -5.211720181 |                         |
| S000180 | 230000  | 235000  | 0.013583895 | 0.002511431 | -5.369073045 | KacstDP.mRNA.S000180.22 |
| S000180 | 235000  | 240000  | 0.008305525 | 0.001413521 | -5.599110101 | KacstDP.mRNA.S000180.23 |
| S000180 | 240000  | 245000  | 0.008475956 | 0.001429094 | -5.625100412 |                         |
| S000211 | 35000   | 40000   | 0.005444409 | 0.00070804  | -6.346426088 | KacstDP.mRNA.S000211.6  |
| S000211 | 40000   | 45000   | 0.004355498 | 0.000861733 | -5.180766792 |                         |

|         |        |        |             |             |              |                         |
|---------|--------|--------|-------------|-------------|--------------|-------------------------|
| S000260 | 370000 | 375000 | 0.008641501 | 0.001740117 | -5.131804052 | KacstDP.mRNA.S000260.22 |
| S000260 | 375000 | 380000 | 0.010981504 | 0.001935519 | -5.50187725  |                         |
| S000260 | 385000 | 390000 | 0.011158671 | 0.00172392  | -5.867967404 |                         |
| S000298 | 225000 | 230000 | 0.009925663 | 0.001763636 | -5.479400387 | KacstDP.mRNA.S000298.18 |
| S000298 | 230000 | 235000 | 0.008859012 | 0.001398061 | -5.808886109 |                         |
| S000303 | 140000 | 145000 | 0.008544548 | 0.001675799 | -5.205087561 | KacstDP.mRNA.S000303.8  |
| S000303 | 150000 | 155000 | 0.011741569 | 0.002449139 | -5.033946918 |                         |
| S000303 | 160000 | 165000 | 0.008577681 | 0.001665866 | -5.232354571 |                         |
| S000333 | 50000  | 55000  | 0.011140905 | 0.002265727 | -5.104311978 |                         |
| S000333 | 55000  | 60000  | 0.013891483 | 0.002314036 | -5.658687012 |                         |
| S000350 | 150000 | 155000 | 0.008952462 | 0.000931983 | -6.964614322 | KacstDP.mRNA.S000350.14 |
| S000350 | 160000 | 165000 | 0.008312883 | 0.001625331 | -5.213676315 |                         |
| S000350 | 165000 | 170000 | 0.00679058  | 0.001375995 | -5.114400384 |                         |
| S000361 | 40000  | 45000  | 0.006267588 | 0.000788435 | -6.438804829 | KacstDP.mRNA.S000361.4  |
| S000361 | 45000  | 50000  | 0.004680779 | 0.000833212 | -5.474360097 |                         |
| S000406 | 100000 | 105000 | 0.014871019 | 0.00268971  | -5.430047829 | KacstDP.mRNA.S000406.6  |
| S000406 | 105000 | 110000 | 0.011748469 | 0.001187822 | -7.045823247 |                         |
| S000406 | 110000 | 115000 | 0.005530116 | 0.000873339 | -5.806917313 |                         |
| S000406 | 115000 | 120000 | 0.010939075 | 0.000908683 | -7.591707773 |                         |
| S000406 | 120000 | 125000 | 0.011095016 | 0.001119814 | -7.050634404 |                         |
| S000406 | 125000 | 130000 | 0.013655309 | 0.000799358 | -8.563957038 |                         |
| S000406 | 130000 | 135000 | 0.012368052 | 0.000920772 | -7.896069784 |                         |
| S000406 | 140000 | 145000 | 0.011962771 | 0.002447747 | -5.087375858 |                         |
| S000406 | 145000 | 150000 | 0.013158292 | 0.002022389 | -5.882292589 |                         |
| S000465 | 5000   | 10000  | 0.004184037 | 0.000490612 | -6.634050451 | KacstDP.mRNA.S000465.1  |
| S000465 | 10000  | 15000  | 0.006677053 | 0.000885322 | -6.29263368  |                         |
| S000472 | 15000  | 20000  | 0.013621746 | 0.002344576 | -5.567789478 | KacstDP.mRNA.S000472.4  |



|         |        |        |             |             |              |                          |
|---------|--------|--------|-------------|-------------|--------------|--------------------------|
| S000472 | 20000  | 25000  | 0.009762284 | 0.001941563 | -5.16627732  |                          |
| S000678 | 90000  | 95000  | 0.019776825 | 0.002413164 | -6.523466525 | KacstDP.mRNA.S000678.6   |
| S000678 | 95000  | 100000 | 0.016679099 | 0.001687407 | -7.044050267 |                          |
| S000678 | 100000 | 105000 | 0.018270534 | 0.000910586 | -9.010895796 |                          |
| S000678 | 105000 | 110000 | 0.014414173 | 0.001893567 | -6.318383563 |                          |
| S000678 | 110000 | 115000 | 0.010544581 | 0.001505197 | -6.087634483 |                          |
| S000678 | 115000 | 120000 | 0.018546113 | 0.003119549 | -5.631709446 |                          |
| S000678 | 120000 | 125000 | 0.017223272 | 0.002752186 | -5.774207672 |                          |
| S000713 | 45000  | 50000  | 0.005743178 | 0.000954217 | -5.665893718 | KacstDP.mRNA.S000713.1   |
| S000713 | 50000  | 55000  | 0.010655727 | 0.001812495 | -5.600654544 | KacstDP.mRNA.S000713.1.1 |
| S000713 | 55000  | 60000  | 0.00495268  | 0.000962596 | -5.230220559 | KacstDP.mRNA.S000713.3   |
| S000713 | 65000  | 70000  | 0.00585114  | 0.000907917 | -5.855807103 |                          |
| S000713 | 75000  | 80000  | 0.008812318 | 0.001540414 | -5.524830694 |                          |
| S000713 | 80000  | 85000  | 0.009167451 | 0.000995756 | -6.846666416 |                          |
| S000713 | 90000  | 95000  | 0.012629771 | 0.001197064 | -7.225239503 |                          |
| S000713 | 95000  | 100000 | 0.004842631 | 0.000912539 | -5.316152259 |                          |
| S000713 | 100000 | 105000 | 0.005158712 | 0.000931009 | -5.436138348 |                          |
| S000723 | 10000  | 15000  | 0.009929602 | 0.001703398 | -5.577047092 | KacstDP.mRNA.S000723.1   |
| S000723 | 15000  | 20000  | 0.009078728 | 0.001534688 | -5.617916965 |                          |
| S000753 | 60000  | 65000  | 0.006916872 | 0.001020786 | -5.99513194  | KacstDP.mRNA.S000753.1   |
| S000753 | 65000  | 70000  | 0.010118519 | 0.001953753 | -5.248458085 |                          |
| S000806 | 40000  | 45000  | 0.022277886 | 0.002273159 | -7.020327564 | KacstDP.mRNA.S000806.4   |
| S000806 | 45000  | 50000  | 0.01551857  | 0.00300648  | -5.23915782  | KacstDP.mRNA.S000806.5   |
| S000806 | 50000  | 55000  | 0.019591912 | 0.002865756 | -6.019839738 |                          |
| S001237 | 30000  | 35000  | 0.006415394 | 0.001167166 | -5.413770976 |                          |
| S001237 | 35000  | 40000  | 0.005428086 | 0.001084694 | -5.153097092 |                          |
| S001416 | 10000  | 15000  | 0.008158672 | 0.001364835 | -5.646922318 | KacstDP.mRNA.S001416.1   |

|         |       |       |             |             |              |                        |
|---------|-------|-------|-------------|-------------|--------------|------------------------|
| S001416 | 15000 | 20000 | 0.01173465  | 0.002127253 | -5.423751705 | KacstDP.mRNA.S001416.2 |
| S001416 | 20000 | 25000 | 0.008539382 | 0.001361375 | -5.780673416 | KacstDP.mRNA.S001416.3 |
| S001445 | 5000  | 10000 | 0.018782552 | 0.001181955 | -8.36305836  | KacstDP.mRNA.S001445.2 |
| S001445 | 15000 | 20000 | 0.005765897 | 0.001127751 | -5.212677211 |                        |
| S001487 | 10000 | 15000 | 0.006506877 | 0.001046816 | -5.755429266 | KacstDP.mRNA.S001487.1 |
| S001487 | 15000 | 20000 | 0.011446145 | 0.001764377 | -5.874188146 | KacstDP.mRNA.S001487.2 |
| S001497 | 15000 | 20000 | 0.01207546  | 0.002363228 | -5.211042217 | KacstDP.mRNA.S001497.4 |
| S001497 | 30000 | 35000 | 0.006707567 | 0.00094931  | -6.111436527 |                        |
| S001747 | 15000 | 20000 | 0.006484217 | 0.001319285 | -5.103071176 |                        |
| S001747 | 20000 | 25000 | 0.008104145 | 0.001488002 | -5.388267167 |                        |

---

<sup>a</sup>Transcript identifiers that found within the genomic interval

Supplementary Table 8. Genomic regions with outlier Z scores for the statistic  $\theta_{\text{Africa}}/\theta_{\text{Middle East}}$ .

| Scaffold | Start position (bp) | Stop position (bp) | $\theta$ , North Africa | $\theta$ , Middle East | Z, North Africa | Transcript ID <sup>a</sup>                           |
|----------|---------------------|--------------------|-------------------------|------------------------|-----------------|------------------------------------------------------|
| S000035  | 1180000             | 1185000            | 0.000138604             | 0.00201177             | -8.111340705    | KacstDP.mRNA.S000035.101                             |
| S000035  | 1190000             | 1195000            | 0.000300968             | 0.005467611            | -8.734858531    | KacstDP.mRNA.S000035.102<br>KacstDP.mRNA.S000035.103 |
| S000046  | 960000              | 965000             | 0.000321926             | 0.002292854            | -6.133590803    | KacstDP.mRNA.S000046.81                              |
| S000046  | 970000              | 975000             | 0.000583183             | 0.002937346            | -5.171076775    | KacstDP.mRNA.S000046.82                              |
| S000051  | 600000              | 605000             | 0.000273355             | 0.00132503             | -5.064561513    | KacstDP.mRNA.S000051.46                              |
| S000051  | 605000              | 610000             | 0.00053259              | 0.003286079            | -5.734849421    |                                                      |
| S000125  | 170000              | 175000             | 0.000371492             | 0.002397117            | -5.859296027    | KacstDP.mRNA.S000125.11                              |
| S000125  | 175000              | 180000             | 0.000532262             | 0.006426701            | -7.599987913    |                                                      |
| S000145  | 610000              | 615000             | 0.000779263             | 0.00403221             | -5.245974834    | KacstDP.mRNA.S000145.43                              |
| S000145  | 615000              | 620000             | 0.000440682             | 0.003109052            | -6.107251224    |                                                      |
| S000153  | 425000              | 430000             | 0.000444999             | 0.002829535            | -5.818461133    | KacstDP.mRNA.S000153.31                              |
| S000153  | 430000              | 435000             | 0.000366106             | 0.002528329            | -6.047915734    |                                                      |
| S000178  | 390000              | 395000             | 0.002795035             | 0.014176855            | -5.190538109    | KacstDP.mRNA.S000178.31                              |
| S000178  | 405000              | 410000             | 0.000382469             | 0.002763374            | -6.173398052    | KacstDP.mRNA.S000178.34                              |
| S000178  | 410000              | 415000             | 0.000285305             | 0.001707004            | -5.649390383    | KacstDP.mRNA.S000178.32                              |
| S000178  | 440000              | 445000             | 0.000308713             | 0.003449833            | -7.384933752    | KacstDP.mRNA.S000178.33<br>KacstDP.mRNA.S000178.35   |
| S000216  | 150000              | 155000             | 0.000302138             | 0.003057022            | -7.108915969    | KacstDP.mRNA.S000216.14                              |
| S000216  | 155000              | 160000             | 0.000547364             | 0.004970892            | -6.808685495    |                                                      |

---

|         |        |        |             |             |              |                         |
|---------|--------|--------|-------------|-------------|--------------|-------------------------|
| S000237 | 60000  | 65000  | 0.000456827 | 0.003297798 | -6.171023971 | KacstDP.mRNA.S000237.5  |
| S000237 | 70000  | 75000  | 0.001263912 | 0.006509414 | -5.232963729 |                         |
| S000262 | 135000 | 140000 | 0.0016658   | 0.009239133 | -5.438831094 | KacstDP.mRNA.S000262.13 |
| S000262 | 140000 | 145000 | 0.00122317  | 0.00898391  | -6.219039526 |                         |
| S000356 | 190000 | 195000 | 0.001059098 | 0.00856635  | -6.486940872 | KacstDP.mRNA.S000356.17 |
| S000356 | 195000 | 200000 | 0.000992718 | 0.00648772  | -5.894647048 |                         |
| S000364 | 220000 | 225000 | 0.001289077 | 0.007174415 | -5.448421517 | KacstDP.mRNA.S000364.17 |
| S000364 | 225000 | 230000 | 0.001595254 | 0.007741268 | -5.067654781 | KacstDP.mRNA.S000364.18 |
| S000364 | 230000 | 235000 | 0.001247045 | 0.006416759 | -5.230459714 |                         |
| S000364 | 235000 | 240000 | 0.001474231 | 0.007716537 | -5.277944438 |                         |
| S000433 | 20000  | 25000  | 0.000674709 | 0.003964882 | -5.599423147 | KacstDP.mRNA.S000433.2  |
| S000433 | 30000  | 35000  | 0.001552555 | 0.00759928  | -5.091598905 |                         |
| S000433 | 65000  | 70000  | 0.001056718 | 0.005072052 | -5.037221342 |                         |
| S000433 | 70000  | 75000  | 0.000480505 | 0.005736636 | -7.568623226 | KacstDP.mRNA.S000433.6  |
| S000576 | 95000  | 100000 | 0.000337912 | 0.002156099 | -5.82811408  |                         |
| S000576 | 110000 | 115000 | 0.000203219 | 0.00096275  | -5.000917597 | KacstDP.mRNA.S000576.6  |
| S000585 | 40000  | 45000  | 0.000366774 | 0.002894125 | -6.418234266 |                         |
| S000585 | 45000  | 50000  | 0.000446989 | 0.002458524 | -5.415606262 |                         |
| S000959 | 50000  | 55000  | 0.000493893 | 0.002702981 | -5.401741422 |                         |
| S000959 | 60000  | 65000  | 0.000292709 | 0.002722385 | -6.874925826 |                         |
| S001008 | 25000  | 30000  | 0.003367143 | 0.015971442 | -5.004329287 | KacstDP.mRNA.S001080.2  |
| S001008 | 30000  | 35000  | 0.003539565 | 0.017529974 | -5.124260058 |                         |
| S001373 | 35000  | 40000  | 0.004343273 | 0.027678999 | -5.824712106 |                         |

---

---

|         |       |       |             |             |              |                        |
|---------|-------|-------|-------------|-------------|--------------|------------------------|
| S001373 | 40000 | 45000 | 0.006186785 | 0.03577077  | -5.554323131 |                        |
| S001411 | 10000 | 15000 | 0.000618504 | 0.003043144 | -5.10602054  | KacstDP.mRNA.S001411.2 |
| S001411 | 15000 | 20000 | 0.000385184 | 0.002385274 | -5.744988488 |                        |
| S001411 | 20000 | 25000 | 0.000572589 | 0.00352272  | -5.726854377 |                        |
| S001479 | 30000 | 35000 | 0.000716288 | 0.003650154 | -5.203528972 | KacstDP.mRNA.S001479.5 |
| S001479 | 35000 | 40000 | 0.000636582 | 0.006249991 | -7.025322595 |                        |

---

<sup>a</sup>Transcript identifiers that found within the genomic interval

Supplementary Table 9. Test for homogeneity of positive and negative Tajima's D values in candidate sweep regions versus the remainder of the genome. Candidate sweep regions are here represented as intervals in the tails of the Z-score distribution of  $\log(\theta_{\text{Middle East}}/\theta_{\text{Africa}})$  and  $\log(\theta_{\text{Africa}}/\theta_{\text{Middle East}})$ , where the tail is defined as intervals 3 standard deviations from the mean for the lower tail of the distribution. Tests are a two-tailed chi-square 2 X 2 contingency table with Yates correction.

| $\theta_{\text{Middle East}}/\theta_{\text{Africa}}$ | <i>D</i> (-) | <i>D</i> (+) | Total |
|------------------------------------------------------|--------------|--------------|-------|
| Tail                                                 | 459          | 161          | 620   |
| Genome                                               | 41960        | 43754        | 85714 |
| Total                                                | 42419        | 43915        | 86334 |

Chi-square = 153.903, *df* = 1, *P* < 0.0001

| $\theta_{\text{Africa}}/\theta_{\text{Middle East}}$ | <i>D</i> (-) | <i>D</i> (+) | Total |
|------------------------------------------------------|--------------|--------------|-------|
| Tail                                                 | 235          | 389          | 624   |
| Genome                                               | 28358        | 57352        | 85710 |
| Total                                                | 28593        | 57741        | 86334 |

Chi-square = 5.647, *df* = 1, *P* < 0.0175

Supplementary Table 10. Summary of fruit color and *VIR* genotype of date palm varieties.

| Variety      | Color                          | Genotype                  |
|--------------|--------------------------------|---------------------------|
| Abel         | NA                             | $VIR^{copia}/VIR^{copia}$ |
| Abouman      | Yellow                         | $VIR^{copia}/VIR^{copia}$ |
| Ajwa         | Red                            | $VIR^+/VIR^+$             |
| Alig         | NA                             | $VIR^{copia}/VIR^+$       |
| Amir_haj     | Yellow                         | $VIR^{copia}/VIR^+$       |
| Aseel        | NA                             | $VIR^{copia}/VIR^+$       |
| Aziza        | NA                             | $VIR^{copia}/VIR^{copia}$ |
| Azraq_Azraq  | Yellow                         | $VIR^{copia}/VIR^+$       |
| Barhee       | Yellow                         | $VIR^{copia}/VIR^{copia}$ |
| Began        | NA                             | $VIR^+/VIR^+$             |
| Besser_heloo | NA                             | $VIR^{copia}/VIR^+$       |
| Biddajaj     | NA                             | $VIR^{copia}/VIR^{copia}$ |
| Braim        | Yellow with fine red stippling | $VIR^{copia}/VIR^+$       |
| Chichi       | Yellow                         | $VIR^{copia}/VIR^{copia}$ |
| Dajwani      | Yellow                         | $VIR^{copia}/VIR^{copia}$ |
| Dayri        | Red                            | $VIR^{copia}/?$           |
| Dedhi        | NA                             | $VIR^{copia}/VIR^{copia}$ |
| Deglet_noor  | NA                             | $VIR^{copia}/VIR^+$       |
| Dibbas       | Golden yellow                  | $VIR^{copia}/VIR^{copia}$ |
| Ebrahimi     | Yellow                         | $VIR^{copia}/VIR^+$       |
| Ewent_ayob   | Yellow                         | $VIR^{copia}/VIR^{copia}$ |
| Fagous       | NA                             | $VIR^{copia}/VIR^{copia}$ |
| Fard4        | NA                             | $VIR^+/VIR^+$             |
| Faslee       | NA                             | $VIR^{copia}/VIR^{copia}$ |
| Halawy       | Yellow                         | $VIR^{copia}/VIR^{copia}$ |
| Hayany       | Red                            | $VIR^+/VIR^+$             |
| Helwa        | Yellow                         | $VIR^{copia}/VIR^{copia}$ |
| Hilali       | Yellow                         | $VIR^{copia}/VIR^+$       |
| Hiri         | Yellow                         | $VIR^{copia}/VIR^{copia}$ |
| Horra        | Yellow                         | $VIR^{copia}/VIR^{copia}$ |
| Jao          | NA                             | $VIR^{copia}/VIR^{copia}$ |
| Kabkab red   | Red                            | $VIR^+/VIR^+$             |
| Karbali      | NA                             | $VIR^{copia}/VIR^{copia}$ |
| Kashoowari   | NA                             | $VIR^{copia}/VIR^+$       |
| Khadrawy     | Yellow                         | $VIR^{copia}/VIR^{copia}$ |
| Khasoy       | NA                             | $VIR^+/VIR^+$             |
| Khastawi     | Yellow                         | $VIR^{copia}/VIR^+$       |
| Khenezi      | Red                            | $VIR^+/VIR^+$             |
| Khisab       | Red                            | $VIR^+/VIR^+$             |
| Kuproo       | NA                             | $VIR^{copia}/VIR^{copia}$ |
| Lulu         | Yellow                         | $VIR^{copia}/VIR^{copia}$ |
| Maktoumi     | Yellow                         | $VIR^{copia}/VIR^{copia}$ |
| Mazafati     | NA                             | $VIR^+/VIR^+$             |
| Medjool      | Orange-yellow                  | $VIR^{copia}/VIR^+$       |
| Nagal        | NA                             | $VIR^{copia}/VIR^+$       |

---

|               |               |                                            |
|---------------|---------------|--------------------------------------------|
| Naquel_khuh   | NA            | VIR <sup>copia</sup> /MIR <sup>+</sup>     |
| Nebeit_seif   | Yellow        | VIR <sup>copia</sup> /MIR <sup>+</sup>     |
| P. sylvestris | NA            |                                            |
| Piavom        | NA            | VIR <sup>copia</sup> /MIR <sup>+</sup>     |
| Rabee         | NA            | VIR <sup>copia</sup> /MIR <sup>+</sup>     |
| Rhars         | Yellow        | VIR <sup>copia</sup> /MIR <sup>copia</sup> |
| Rothan        | Yellow        |                                            |
| Saidi         | Orange-yellow | VIR <sup>copia</sup> /MIR <sup>+</sup>     |
| Samany        | Yellow        | VIR <sup>copia</sup> /MIR <sup>+</sup>     |
| Shagri        | NA            | VIR <sup>copia</sup> /MIR <sup>copia</sup> |
| Silani        | Yellow        | VIR <sup>copia</sup> /MIR <sup>copia</sup> |
| Sultana       | Yellow        | VIR <sup>copia</sup> /MIR <sup>copia</sup> |
| Tagiat        | NA            | VIR <sup>copia</sup> /MIR <sup>copia</sup> |
| Thory         | Yellow        | VIR <sup>copia</sup> /MIR <sup>copia</sup> |
| Um al-blaliz  | Red           | VIR <sup>+</sup> /MIR <sup>+</sup>         |
| Um- al-hamam  | Yellow        | VIR <sup>copia</sup> /MIR <sup>copia</sup> |
| Zagloul       | Red           | VIR <sup>+</sup> /MIR <sup>+</sup>         |
| Zahidi        | Yellow        | VIR <sup>copia</sup> /MIR <sup>copia</sup> |

---
