# Supplementary material for: Whole genome re-sequencing of date palms yields insights into diversification of a fruit tree crop
Source: Springer Nature journal article supplement (doi:10.1038/ncomms9824), 2015-11-09
Supplement: 41467_2015_BFncomms9824_MOESM957_ESM.pdf [file 41467_2015_BFncomms9824_MOESM957_ESM.pdf]

Supplementary Data 1. Candidate genes in flowering time, sugar metabolism, fruit maturation, and disease resistance pathways.

| Gene ID                  | Transcript ID            | Gene | Trait          |
|--------------------------|--------------------------|------|----------------|
| KacstDP.gene.S000796.7   | KacstDP.mRNA.S000796.7   | PHYA | Flowering time |
| KacstDP.gene.S000017.102 | KacstDP.mRNA.S000017.102 | GAI  | Flowering time |
| KacstDP.gene.S000018.20  | KacstDP.mRNA.S000018.20  | MFT  | Flowering time |
| KacstDP.gene.S000089.34  | KacstDP.mRNA.S000089.34  | GI   | Flowering time |
| KacstDP.gene.S000002.289 | KacstDP.mRNA.S000002.289 | GI   | Flowering time |
| KacstDP.gene.S000070.66  | KacstDP.mRNA.S000070.66  | PFT1 | Flowering time |
| KacstDP.gene.S000747.6   | KacstDP.mRNA.S000747.6   | FRL2 | Flowering time |
| KacstDP.gene.S000266.17  | KacstDP.mRNA.S000266.17  | FT   | Flowering time |
| KacstDP.gene.S000001.n8  | KacstDP.mRNA.S000001.n8  | FT   | Flowering time |
| KacstDP.gene.S000462.4   | KacstDP.mRNA.S000462.4   | RGL2 | Flowering time |
| KacstDP.gene.S000010.55  | KacstDP.mRNA.S000010.55  | FKF1 | Flowering time |
| KacstDP.gene.S000013.77  | KacstDP.mRNA.S000013.77  | PHYB | Flowering time |
| KacstDP.gene.S000112.35  | KacstDP.mRNA.S000112.35  | FVE  | Flowering time |
| KacstDP.gene.S000008.85  | KacstDP.mRNA.S000008.85  | FVE  | Flowering time |
| KacstDP.gene.S000017.61  | KacstDP.mRNA.S000017.61  | SVP  | Flowering time |
| KacstDP.gene.S000025.20  | KacstDP.mRNA.S000025.20  | ATC  | Flowering time |
| KacstDP.gene.S000003.35  | KacstDP.mRNA.S000003.35  | ATC  | Flowering time |
| KacstDP.gene.S000096.56  | KacstDP.mRNA.S000096.56  | SOC1 | Flowering time |
| KacstDP.gene.S000004.37  | KacstDP.mRNA.S000004.37  | SOC1 | Flowering time |
| KacstDP.gene.S000811.8   | KacstDP.mRNA.S000811.8   | FLK  | Flowering time |
| KacstDP.gene.S000434.9   | KacstDP.mRNA.S000434.9   | GAr1 | Flowering time |
| KacstDP.gene.S000108.14  | KacstDP.mRNA.S000108.14  | GAr1 | Flowering time |
| KacstDP.gene.S000415.13  | KacstDP.mRNA.S000415.13  | SPY  | Flowering time |
| KacstDP.gene.S000319.23  | KacstDP.mRNA.S000319.23  | SPY  | Flowering time |

|                           |                             |         |                               |
|---------------------------|-----------------------------|---------|-------------------------------|
| KacstDP.gene.S001969.1    | KacstDP.mRNA.S001969.1      | GA1     | Flowering time                |
| KacstDP.gene.S000219.17   | KacstDP.mRNA.S000219.17     | CRY1    | Flowering time                |
| KacstDP.gene.S000067.41   | KacstDP.mRNA.S000067.41.1   | CRY1    | Flowering time                |
| KacstDP.gene.S000067.41   | KacstDP.mRNA.S000067.41     | CRY1    | Flowering time                |
| KacstDP.gene.S000637.5    | KacstDP.mRNA.S000637.5      | ESD4    | Flowering time                |
| KacstDP.gene.S000093.9    | KacstDP.mRNA.S000093.9      | EBS     | Flowering time                |
| KacstDP.gene.S000006.37   | KacstDP.mRNA.S000006.37     | SLY1    | Flowering time                |
| KacstDP.gene.S000251.25   | KacstDP.mRNA.S000251.25     | VIN3L   | Flowering time                |
| KacstDP.gene.S000038.18   | KacstDP.mRNA.S000038.18     | ATMYB33 | Flowering time                |
| KacstDP.gene.S000016.n262 | KacstDP.mRNA.S000016.n286.1 | CO      | Flowering time                |
| KacstDP.gene.S000057.72   | KacstDP.mRNA.S000057.72     | CO      | Flowering time                |
| KacstDP.gene.S000194.8    | KacstDP.mRNA.S000194.8      | FPF1    | Flowering time                |
| KacstDP.gene.S000059.n618 | KacstDP.mRNA.S000059.n658   | FPF1    | Flowering time                |
| KacstDP.gene.S000316.19   | KacstDP.mRNA.S000316.19     | CDF1    | Flowering time                |
| KacstDP.gene.S000228.12   | KacstDP.mRNA.S000228.12     | CDF1    | Flowering time                |
| KacstDP.gene.S000771.5    | KacstDP.mRNA.S000771.5      | H XK    | Starch and sucrose metabolism |
| KacstDP.gene.S000368.13   | KacstDP.mRNA.S000368.13     | H XK    | Starch and sucrose metabolism |
| KacstDP.gene.S000003.136  | KacstDP.mRNA.S000003.136    | H XK    | Starch and sucrose metabolism |
| KacstDP.gene.S000005.13   | KacstDP.mRNA.S000005.13     | H XK    | Starch and sucrose metabolism |
| KacstDP.gene.S002141.2    | KacstDP.mRNA.S002141.2      | H XK    | Starch and sucrose metabolism |
| KacstDP.gene.S000041.6    | KacstDP.mRNA.S000041.6      | H XK    | Starch and sucrose metabolism |
| KacstDP.gene.S017439.1    | KacstDP.mRNA.S017439.1      | H XK    | Starch and sucrose metabolism |
| KacstDP.gene.S000101.6    | KacstDP.mRNA.S000101.6      | INV     | Starch and sucrose metabolism |
| KacstDP.gene.S000088.48   | KacstDP.mRNA.S000088.48     | INV     | Starch and sucrose metabolism |
| KacstDP.gene.S000022.70   | KacstDP.mRNA.S000022.70     | INV     | Starch and sucrose metabolism |
| KacstDP.gene.S000014.122  | KacstDP.mRNA.S000014.122    | INV     | Starch and sucrose metabolism |
| KacstDP.gene.S000003.55   | KacstDP.mRNA.S000003.55     | INV     | Starch and sucrose metabolism |

|                          |                          |                     |                               |
|--------------------------|--------------------------|---------------------|-------------------------------|
| KacstDP.gene.S000199.37  | KacstDP.mRNA.S000199.37  | INV                 | Starch and sucrose metabolism |
| KacstDP.gene.S000013.100 | KacstDP.mRNA.S000013.100 | INV                 | Starch and sucrose metabolism |
| KacstDP.gene.S000102.22  | KacstDP.mRNA.S000102.22  | SPS                 | Starch and sucrose metabolism |
| KacstDP.gene.S000106.22  | KacstDP.mRNA.S000106.22  | SPS                 | Starch and sucrose metabolism |
| KacstDP.gene.S000003.204 | KacstDP.mRNA.S000003.204 | SPS                 | Starch and sucrose metabolism |
| KacstDP.gene.S000359.16  | KacstDP.mRNA.S000359.16  | SPS                 | Starch and sucrose metabolism |
| KacstDP.gene.S000036.66  | KacstDP.mRNA.S000036.66  | SPS                 | Starch and sucrose metabolism |
| KacstDP.gene.S000183.16  | KacstDP.mRNA.S000183.16  | SUS                 | Starch and sucrose metabolism |
| KacstDP.gene.S000135.48  | KacstDP.mRNA.S000135.48  | SUS                 | Starch and sucrose metabolism |
| KacstDP.gene.S000002.59  | KacstDP.mRNA.S000002.59  | SUS                 | Starch and sucrose metabolism |
| KacstDP.gene.S000059.46  | KacstDP.mRNA.S000059.46  | SUS                 | Starch and sucrose metabolism |
| KacstDP.gene.S000007.151 | KacstDP.mRNA.S000007.151 | SUS                 | Starch and sucrose metabolism |
| KacstDP.gene.S000051.43  | KacstDP.mRNA.S000051.43  | SUS                 | Starch and sucrose metabolism |
| KacstDP.gene.S000117.18  | KacstDP.mRNA.S000117.18  | SUS                 | Starch and sucrose metabolism |
| KacstDP.gene.S000028.30  | KacstDP.mRNA.S000028.30  | SUS                 | Starch and sucrose metabolism |
| KacstDP.gene.S000028.31  | KacstDP.mRNA.S000028.31  | SUS                 | Starch and sucrose metabolism |
| KacstDP.gene.S000002.n35 | KacstDP.mRNA.S000002.n41 | SUS                 | Starch and sucrose metabolism |
| KacstDP.gene.S000172.24  | KacstDP.mRNA.S000172.24  | phosphofructokinase | Starch and sucrose metabolism |
| KacstDP.gene.S000152.33  | KacstDP.mRNA.S000152.33  | phosphofructokinase | Starch and sucrose metabolism |
| KacstDP.gene.S000096.8   | KacstDP.mRNA.S000096.8.1 | phosphofructokinase | Starch and sucrose metabolism |
| KacstDP.gene.S000096.8   | KacstDP.mRNA.S000096.8   | phosphofructokinase | Starch and sucrose metabolism |
| KacstDP.gene.S000122.28  | KacstDP.mRNA.S000122.28  | phosphofructokinase | Starch and sucrose metabolism |
| KacstDP.gene.S003571.1   | KacstDP.mRNA.S003571.1   | phosphofructokinase | Starch and sucrose metabolism |
| KacstDP.gene.S000109.29  | KacstDP.mRNA.S000109.29  | phosphofructokinase | Starch and sucrose metabolism |
| KacstDP.gene.S000841.5   | KacstDP.mRNA.S000841.5   | phosphofructokinase | Starch and sucrose metabolism |
| KacstDP.gene.S000218.24  | KacstDP.mRNA.S000218.24  | phosphofructokinase | Starch and sucrose metabolism |
| KacstDP.gene.S000005.40  | KacstDP.mRNA.S000005.40  | phosphofructokinase | Starch and sucrose metabolism |

|                          |                          |                         |                               |
|--------------------------|--------------------------|-------------------------|-------------------------------|
| KacstDP.gene.S000304.1   | KacstDP.mRNA.S000304.1   | phosphofructokinase     | Starch and sucrose metabolism |
| KacstDP.gene.S000112.69  | KacstDP.mRNA.S000112.69  | phosphofructokinase     | Starch and sucrose metabolism |
| KacstDP.gene.S000050.46  | KacstDP.mRNA.S000050.46  | phosphofructokinase     | Starch and sucrose metabolism |
| KacstDP.gene.S002951.1   | KacstDP.mRNA.S002951.1   | phosphofructokinase     | Starch and sucrose metabolism |
| KacstDP.gene.S000228.38  | KacstDP.mRNA.S000228.38  | phosphofructokinase     | Starch and sucrose metabolism |
| KacstDP.gene.S000494.5   | KacstDP.mRNA.S000494.5   | phosphofructokinase     | Starch and sucrose metabolism |
| KacstDP.gene.S000015.136 | KacstDP.mRNA.S000015.136 | phosphofructokinase     | Starch and sucrose metabolism |
| KacstDP.gene.S000159.19  | KacstDP.mRNA.S000159.19  | Fructokinase            | Starch and sucrose metabolism |
| KacstDP.gene.S000047.19  | KacstDP.mRNA.S000047.19  | starch synthase SS      | Starch and sucrose metabolism |
| KacstDP.gene.S000137.28  | KacstDP.mRNA.S000137.28  | starch synthase SS      | Starch and sucrose metabolism |
| KacstDP.gene.S000021.77  | KacstDP.mRNA.S000021.77  | starch synthase SS      | Starch and sucrose metabolism |
| KacstDP.gene.S000003.183 | KacstDP.mRNA.S000003.183 | starch synthase SS      | Starch and sucrose metabolism |
| KacstDP.gene.S000228.17  | KacstDP.mRNA.S000228.17  | starch synthase SS      | Starch and sucrose metabolism |
| KacstDP.gene.S000814.6   | KacstDP.mRNA.S000814.6   | starch synthase SS      | Starch and sucrose metabolism |
| KacstDP.gene.S000008.68  | KacstDP.mRNA.S000008.68  | starch synthase SS      | Starch and sucrose metabolism |
| KacstDP.gene.S000023.47  | KacstDP.mRNA.S000023.47  | Phosphoglucomutase      | Starch and sucrose metabolism |
| KacstDP.gene.S000010.44  | KacstDP.mRNA.S000010.44  | Phosphoglucomutase      | Starch and sucrose metabolism |
| KacstDP.gene.S000003.101 | KacstDP.mRNA.S000003.101 | Phosphoglucomutase      | Starch and sucrose metabolism |
| KacstDP.gene.S027867.1   | KacstDP.mRNA.S027867.1   | Phosphoglucomutase      | Starch and sucrose metabolism |
| KacstDP.gene.S000029.127 | KacstDP.mRNA.S000029.127 | Phosphoglucomutase      | Starch and sucrose metabolism |
| KacstDP.gene.S000073.47  | KacstDP.mRNA.S000073.47  | Phosphoglucomutase      | Starch and sucrose metabolism |
| KacstDP.gene.S001139.2   | KacstDP.mRNA.S001139.2   | Phosphoglycerate kinase | Starch and sucrose metabolism |
| KacstDP.gene.S000315.20  | KacstDP.mRNA.S000315.20  | Phosphoglycerate kinase | Starch and sucrose metabolism |
| KacstDP.gene.S000034.109 | KacstDP.mRNA.S000034.109 | Phosphoglycerate kinase | Starch and sucrose metabolism |
| KacstDP.gene.S001139.1   | KacstDP.mRNA.S001139.1   | Phosphoglycerate kinase | Starch and sucrose metabolism |
| KacstDP.gene.S000315.19  | KacstDP.mRNA.S000315.19  | Phosphoglycerate kinase | Starch and sucrose metabolism |
| KacstDP.gene.S000456.1   | KacstDP.mRNA.S000456.1   | Phosphoglycerate kinase | Starch and sucrose metabolism |

|                          |                          |                                |                               |
|--------------------------|--------------------------|--------------------------------|-------------------------------|
| KacstDP.gene.S000175.35  | KacstDP.mRNA.S000175.35  | ADP-glucose phosphorylase      | Starch and sucrose metabolism |
| KacstDP.gene.S000665.8   | KacstDP.mRNA.S000665.8   | ADP-glucose phosphorylase      | Starch and sucrose metabolism |
| KacstDP.gene.S000040.34  | KacstDP.mRNA.S000040.34  | ADP-glucose phosphorylase      | Starch and sucrose metabolism |
| KacstDP.gene.S000103.40  | KacstDP.mRNA.S000103.40  | ADP-glucose phosphorylase      | Starch and sucrose metabolism |
| KacstDP.gene.S000020.121 | KacstDP.mRNA.S000020.121 | ADP-glucose phosphorylase      | Starch and sucrose metabolism |
| KacstDP.gene.S000187.20  | KacstDP.mRNA.S000187.20  | ADP-glucose phosphorylase      | Starch and sucrose metabolism |
| KacstDP.gene.S000047.78  | KacstDP.mRNA.S000047.78  | ADP-glucose phosphorylase      | Starch and sucrose metabolism |
| KacstDP.gene.S000551.2   | KacstDP.mRNA.S000551.2   | Fructose-1,6-bisphosphate      | Starch and sucrose metabolism |
| KacstDP.gene.S000031.61  | KacstDP.mRNA.S000031.61  | Fructose-1,6-bisphosphate      | Starch and sucrose metabolism |
| KacstDP.gene.S000777.12  | KacstDP.mRNA.S000777.12  | Fructose-1,6-bisphosphate      | Starch and sucrose metabolism |
| KacstDP.gene.S000314.6   | KacstDP.mRNA.S000314.6   | Fructose-1,6-bisphosphate      | Starch and sucrose metabolism |
| KacstDP.gene.S000094.36  | KacstDP.mRNA.S000094.36  | Fructose-1,6-bisphosphate      | Starch and sucrose metabolism |
| KacstDP.gene.S000033.50  | KacstDP.mRNA.S000033.50  | Fructose-1,6-bisphosphate      | Starch and sucrose metabolism |
| KacstDP.gene.S000014.108 | KacstDP.mRNA.S000014.108 | Fructose-bisphosphate aldolase | Starch and sucrose metabolism |
| KacstDP.gene.S000025.151 | KacstDP.mRNA.S000025.151 | Fructose-bisphosphate aldolase | Starch and sucrose metabolism |
| KacstDP.gene.S000020.125 | KacstDP.mRNA.S000020.125 | Fructose-bisphosphate aldolase | Starch and sucrose metabolism |
| KacstDP.gene.S000005.136 | KacstDP.mRNA.S000005.136 | Fructose-bisphosphate aldolase | Starch and sucrose metabolism |
| KacstDP.gene.S000798.9   | KacstDP.mRNA.S000798.9   | Fructose-bisphosphate aldolase | Starch and sucrose metabolism |
| KacstDP.gene.S000175.19  | KacstDP.mRNA.S000175.19  | Fructose-bisphosphate aldolase | Starch and sucrose metabolism |
| KacstDP.gene.S000074.42  | KacstDP.mRNA.S000074.42  | Fructose-bisphosphate aldolase | Starch and sucrose metabolism |
| KacstDP.gene.S000001.236 | KacstDP.mRNA.S000001.236 | Fructose-bisphosphate aldolase | Starch and sucrose metabolism |
| KacstDP.gene.S000504.12  | KacstDP.mRNA.S000504.12  | Triosephosphate isomerase      | Starch and sucrose metabolism |
| KacstDP.gene.S000027.61  | KacstDP.mRNA.S000027.61  | Triosephosphate isomerase      | Starch and sucrose metabolism |
| KacstDP.gene.S000166.45  | KacstDP.mRNA.S000166.45  | Triosephosphate isomerase      | Starch and sucrose metabolism |
| KacstDP.gene.S000231.9   | KacstDP.mRNA.S000231.9   | Triosephosphate isomerase      | Starch and sucrose metabolism |
| KacstDP.gene.S000316.14  | KacstDP.mRNA.S000316.14  | Malate deshydrogenase MDH      | Starch and sucrose metabolism |
| KacstDP.gene.S000228.21  | KacstDP.mRNA.S000228.21  | Malate deshydrogenase MDH      | Starch and sucrose metabolism |

|                          |                          |                                               |                               |
|--------------------------|--------------------------|-----------------------------------------------|-------------------------------|
| KacstDP.gene.S000002.122 | KacstDP.mRNA.S000002.122 | Malate deshydrogenase MDH                     | Starch and sucrose metabolism |
| KacstDP.gene.S000293.26  | KacstDP.mRNA.S000293.26  | Malate deshydrogenase MDH                     | Starch and sucrose metabolism |
| KacstDP.gene.S000073.82  | KacstDP.mRNA.S000073.82  | Malate deshydrogenase MDH                     | Starch and sucrose metabolism |
| KacstDP.gene.S000022.124 | KacstDP.mRNA.S000022.124 | glucose-6-phosphate isomerase                 | Starch and sucrose metabolism |
| KacstDP.gene.S000353.23  | KacstDP.mRNA.S000353.23  | Ribulose bisphosphate carboxylase small chain | Starch and sucrose metabolism |
| KacstDP.gene.S000141.43  | KacstDP.mRNA.S000141.43  | Ribulose bisphosphate carboxylase small chain | Starch and sucrose metabolism |
| KacstDP.gene.S000102.9   | KacstDP.mRNA.S000102.9   | Ribulose bisphosphate carboxylase small chain | Starch and sucrose metabolism |
| KacstDP.gene.S000251.26  | KacstDP.mRNA.S000251.26  | Ribulose bisphosphate carboxylase small chain | Starch and sucrose metabolism |
| KacstDP.gene.S000012.1   | KacstDP.mRNA.S000012.1   | Ribulose bisphosphate carboxylase small chain | Starch and sucrose metabolism |
| KacstDP.gene.S000004.28  | KacstDP.mRNA.S000004.28  | cellulase                                     | Fruit ripening                |
| KacstDP.gene.S000019.80  | KacstDP.mRNA.S000019.80  | cellulase                                     | Fruit ripening                |
| KacstDP.gene.S000049.24  | KacstDP.mRNA.S000049.24  | cellulase                                     | Fruit ripening                |
| KacstDP.gene.S000092.6   | KacstDP.mRNA.S000092.6   | cellulase                                     | Fruit ripening                |
| KacstDP.gene.S000092.7   | KacstDP.mRNA.S000092.7   | cellulase                                     | Fruit ripening                |
| KacstDP.gene.S000137.42  | KacstDP.mRNA.S000137.42  | cellulase                                     | Fruit ripening                |
| KacstDP.gene.S000187.21  | KacstDP.mRNA.S000187.21  | cellulase                                     | Fruit ripening                |
| KacstDP.gene.S000156.50  | KacstDP.mRNA.S000156.50  | cellulase                                     | Fruit ripening                |
| KacstDP.gene.S000175.33  | KacstDP.mRNA.S000175.33  | cellulase                                     | Fruit ripening                |
| KacstDP.gene.S000175.34  | KacstDP.mRNA.S000175.34  | cellulase                                     | Fruit ripening                |
| KacstDP.gene.S000180.13  | KacstDP.mRNA.S000180.13  | cellulase                                     | Fruit ripening                |
| KacstDP.gene.S000255.8   | KacstDP.mRNA.S000255.8   | cellulase                                     | Fruit ripening                |
| KacstDP.gene.S000255.9   | KacstDP.mRNA.S000255.9   | cellulase                                     | Fruit ripening                |

---

|                          |                          |                  |                |
|--------------------------|--------------------------|------------------|----------------|
| KacstDP.gene.S000262.11  | KacstDP.mRNA.S000262.11  | cellulase        | Fruit ripening |
| KacstDP.gene.S000310.3   | KacstDP.mRNA.S000310.3   | cellulase        | Fruit ripening |
| KacstDP.gene.S000310.5   | KacstDP.mRNA.S000310.5   | cellulase        | Fruit ripening |
| KacstDP.gene.S000441.1   | KacstDP.mRNA.S000441.1   | cellulase        | Fruit ripening |
| KacstDP.gene.S000523.9   | KacstDP.mRNA.S000523.9   | cellulase        | Fruit ripening |
| KacstDP.gene.S000795.1   | KacstDP.mRNA.S000795.1   | cellulase        | Fruit ripening |
| KacstDP.gene.S000922.2   | KacstDP.mRNA.S000922.2   | cellulase        | Fruit ripening |
| KacstDP.gene.S002007.1   | KacstDP.mRNA.S002007.1   | cellulase        | Fruit ripening |
| KacstDP.gene.S000001.328 | KacstDP.mRNA.S000001.328 | alpha-amylase    | Fruit ripening |
| KacstDP.gene.S000003.60  | KacstDP.mRNA.S000003.60  | alpha-amylase    | Fruit ripening |
| KacstDP.gene.S000008.120 | KacstDP.mRNA.S000008.120 | alpha-amylase    | Fruit ripening |
| KacstDP.gene.S000013.181 | KacstDP.mRNA.S000013.181 | alpha-amylase    | Fruit ripening |
| KacstDP.gene.S000025.4   | KacstDP.mRNA.S000025.4   | alpha-amylase    | Fruit ripening |
| KacstDP.gene.S000074.21  | KacstDP.mRNA.S000074.21  | alpha-amylase    | Fruit ripening |
| KacstDP.gene.S000077.31  | KacstDP.mRNA.S000077.31  | alpha-amylase    | Fruit ripening |
| KacstDP.gene.S000145.34  | KacstDP.mRNA.S000145.34  | alpha-amylase    | Fruit ripening |
| KacstDP.gene.S000162.9   | KacstDP.mRNA.S000162.9   | alpha-amylase    | Fruit ripening |
| KacstDP.gene.S000371.20  | KacstDP.mRNA.S000371.20  | alpha-amylase    | Fruit ripening |
| KacstDP.gene.S000375.15  | KacstDP.mRNA.S000375.15  | alpha-amylase    | Fruit ripening |
| KacstDP.gene.S000554.6   | KacstDP.mRNA.S000554.6   | alpha-amylase    | Fruit ripening |
| KacstDP.gene.S000554.7   | KacstDP.mRNA.S000554.7   | alpha-amylase    | Fruit ripening |
| KacstDP.gene.S000634.3   | KacstDP.mRNA.S000634.3   | alpha-amylase    | Fruit ripening |
| KacstDP.gene.S000561.7   | KacstDP.mRNA.S000561.7   | carboxylesterase | Fruit ripening |
| KacstDP.gene.S000442.6   | KacstDP.mRNA.S000442.6   | carboxylesterase | Fruit ripening |
| KacstDP.gene.S000254.27  | KacstDP.mRNA.S000254.27  | carboxylesterase | Fruit ripening |
| KacstDP.gene.S000080.21  | KacstDP.mRNA.S000080.21  | carboxylesterase | Fruit ripening |
| KacstDP.gene.S001430.2   | KacstDP.mRNA.S001430.2   | carboxylesterase | Fruit ripening |

---

---

|                          |                          |                    |                |
|--------------------------|--------------------------|--------------------|----------------|
| KacstDP.gene.S000036.16  | KacstDP.mRNA.S000036.16  | carboxylesterase   | Fruit ripening |
| KacstDP.gene.S000655.2   | KacstDP.mRNA.S000655.2   | carboxylesterase   | Fruit ripening |
| KacstDP.gene.S000062.70  | KacstDP.mRNA.S000062.70  | carboxylesterase   | Fruit ripening |
| KacstDP.gene.S000555.1   | KacstDP.mRNA.S000555.1   | Beta-galactosidase | Fruit ripening |
| KacstDP.gene.S000008.103 | KacstDP.mRNA.S000008.103 | Beta-galactosidase | Fruit ripening |
| KacstDP.gene.S000022.29  | KacstDP.mRNA.S000022.29  | Beta-galactosidase | Fruit ripening |
| KacstDP.gene.S000711.1   | KacstDP.mRNA.S000711.1   | Beta-galactosidase | Fruit ripening |
| KacstDP.gene.S000579.18  | KacstDP.mRNA.S000579.18  | Beta-galactosidase | Fruit ripening |
| KacstDP.gene.S000579.19  | KacstDP.mRNA.S000579.19  | Beta-galactosidase | Fruit ripening |
| KacstDP.gene.S000073.25  | KacstDP.mRNA.S000073.25  | Beta-galactosidase | Fruit ripening |
| KacstDP.gene.S000309.3   | KacstDP.mRNA.S000309.3   | Beta-galactosidase | Fruit ripening |
| KacstDP.gene.S000087.46  | KacstDP.mRNA.S000087.46  | Beta-galactosidase | Fruit ripening |
| KacstDP.gene.S000161.48  | KacstDP.mRNA.S000161.48  | Beta-galactosidase | Fruit ripening |
| KacstDP.gene.S000431.3   | KacstDP.mRNA.S000431.3   | Beta-galactosidase | Fruit ripening |
| KacstDP.gene.S000176.2   | KacstDP.mRNA.S000176.2   | Beta-galactosidase | Fruit ripening |
| KacstDP.gene.S000163.2   | KacstDP.mRNA.S000163.2   | Beta-galactosidase | Fruit ripening |
| KacstDP.gene.S000050.103 | KacstDP.mRNA.S000050.103 | Expansin           | Fruit ripening |
| KacstDP.gene.S000354.5   | KacstDP.mRNA.S000354.5   | Expansin           | Fruit ripening |
| KacstDP.gene.S000320.15  | KacstDP.mRNA.S000320.15  | Expansin           | Fruit ripening |
| KacstDP.gene.S000228.6   | KacstDP.mRNA.S000228.6   | Expansin           | Fruit ripening |
| KacstDP.gene.S000012.12  | KacstDP.mRNA.S000012.12  | Expansin           | Fruit ripening |
| KacstDP.gene.S000019.54  | KacstDP.mRNA.S000019.54  | Expansin           | Fruit ripening |
| KacstDP.gene.S000002.105 | KacstDP.mRNA.S000002.105 | Expansin           | Fruit ripening |
| KacstDP.gene.S000257.17  | KacstDP.mRNA.S000257.17  | Expansin           | Fruit ripening |
| KacstDP.gene.S000232.27  | KacstDP.mRNA.S000232.27  | Expansin           | Fruit ripening |
| KacstDP.gene.S000006.59  | KacstDP.mRNA.S000006.59  | Expansin           | Fruit ripening |
| KacstDP.gene.S000027.67  | KacstDP.mRNA.S000027.67  | Expansin           | Fruit ripening |

---



---

|                            |                            |                                               |                |
|----------------------------|----------------------------|-----------------------------------------------|----------------|
| KacstDP.gene.S000010.179   | KacstDP.mRNA.S000010.179   | Expansin                                      | Fruit ripening |
| KacstDP.gene.S000152.10    | KacstDP.mRNA.S000152.10    | Expansin                                      | Fruit ripening |
| KacstDP.gene.S000394.10    | KacstDP.mRNA.S000394.10    | Expansin                                      | Fruit ripening |
| KacstDP.gene.S000079.58    | KacstDP.mRNA.S000079.58    | Expansin                                      | Fruit ripening |
| KacstDP.gene.S000770.3     | KacstDP.mRNA.S000770.3     | Expansin                                      | Fruit ripening |
| KacstDP.gene.S000077.47    | KacstDP.mRNA.S000077.47    | Expansin                                      | Fruit ripening |
| KacstDP.gene.S000527.n1549 | KacstDP.mRNA.S000527.n1648 | Expansin                                      | Fruit ripening |
| KacstDP.gene.S000796.3     | KacstDP.mRNA.S000796.3     | Expansin                                      | Fruit ripening |
| KacstDP.gene.S000035.15    | KacstDP.mRNA.S000035.15    | Expansin                                      | Fruit ripening |
| KacstDP.gene.S000300.9     | KacstDP.mRNA.S000300.9     | Expansin                                      | Fruit ripening |
| KacstDP.gene.S001366.3     | KacstDP.mRNA.S001366.3     | Expansin                                      | Fruit ripening |
| KacstDP.gene.S000135.8     | KacstDP.mRNA.S000135.8     | Expansin                                      | Fruit ripening |
| KacstDP.gene.S001145.1     | KacstDP.mRNA.S001145.1     | pectin methyltransferase (PMT)                | Fruit ripening |
| KacstDP.gene.S000064.67    | KacstDP.mRNA.S000064.67    | pectin methyltransferase (PMT)                | Fruit ripening |
| KacstDP.gene.S000230.23    | KacstDP.mRNA.S000230.23    | pectin methyltransferase (PMT)                | Fruit ripening |
| KacstDP.gene.S000674.9     | KacstDP.mRNA.S000674.9     | O-acyl transferase                            | Fruit ripening |
| KacstDP.gene.S000151.29    | KacstDP.mRNA.S000151.29    | O-acyl transferase                            | Fruit ripening |
| KacstDP.gene.S000134.42    | KacstDP.mRNA.S000134.42    | 1-aminocyclopropane-1-carboxylate<br>synthase | Fruit ripening |
| KacstDP.gene.S000032.101   | KacstDP.mRNA.S000032.101   | 1-aminocyclopropane-1-carboxylate<br>synthase | Fruit ripening |
| KacstDP.gene.S000062.69    | KacstDP.mRNA.S000062.69    | 1-aminocyclopropane-1-carboxylate<br>synthase | Fruit ripening |
| KacstDP.gene.S000099.66    | KacstDP.mRNA.S000099.66    | 1-aminocyclopropane-1-carboxylate<br>synthase | Fruit ripening |
| KacstDP.gene.S000011.151   | KacstDP.mRNA.S000011.151   | 1-aminocyclopropane-1-carboxylate<br>synthase | Fruit ripening |

---

|                          |                          |                                       |                |
|--------------------------|--------------------------|---------------------------------------|----------------|
| KacstDP.gene.S000619.3   | KacstDP.mRNA.S000619.3   | pectin(pectate) lyase                 | Fruit ripening |
| KacstDP.gene.S000273.13  | KacstDP.mRNA.S000273.13  | pectin(pectate) lyase                 | Fruit ripening |
| KacstDP.gene.S000002.303 | KacstDP.mRNA.S000002.303 | pectin(pectate) lyase                 | Fruit ripening |
| KacstDP.gene.S000119.3   | KacstDP.mRNA.S000119.3   | pectin(pectate) lyase                 | Fruit ripening |
| KacstDP.gene.S000184.29  | KacstDP.mRNA.S000184.29  | pectin(pectate) lyase                 | Fruit ripening |
| KacstDP.gene.S000273.7   | KacstDP.mRNA.S000273.7   | pectin(pectate) lyase                 | Fruit ripening |
| KacstDP.gene.S000619.9   | KacstDP.mRNA.S000619.9   | pectin(pectate) lyase                 | Fruit ripening |
| KacstDP.gene.S000004.214 | KacstDP.mRNA.S000004.214 | pectin(pectate) lyase                 | Fruit ripening |
| KacstDP.gene.S001142.8   | KacstDP.mRNA.S001142.8   | pectin(pectate) lyase                 | Fruit ripening |
| KacstDP.gene.S003461.1   | KacstDP.mRNA.S003461.1   | pectin(pectate) lyase                 | Fruit ripening |
| KacstDP.gene.S000210.36  | KacstDP.mRNA.S000210.36  | pectin(pectate) lyase                 | Fruit ripening |
| KacstDP.gene.S018126.1   | KacstDP.mRNA.S018126.1   | plant invertase/pectin methylesterase | Fruit ripening |
| KacstDP.gene.S000116.6   | KacstDP.mRNA.S000116.6   | plant invertase/pectin methylesterase | Fruit ripening |
| KacstDP.gene.S000059.45  | KacstDP.mRNA.S000059.45  | plant invertase/pectin methylesterase | Fruit ripening |
| KacstDP.gene.S000464.19  | KacstDP.mRNA.S000464.19  | plant invertase/pectin methylesterase | Fruit ripening |
| KacstDP.gene.S000624.4   | KacstDP.mRNA.S000624.4   | plant invertase/pectin methylesterase | Fruit ripening |
| KacstDP.gene.S000913.7   | KacstDP.mRNA.S000913.7   | plant invertase/pectin methylesterase | Fruit ripening |
| KacstDP.gene.S000136.41  | KacstDP.mRNA.S000136.41  | plant invertase/pectin methylesterase | Fruit ripening |
| KacstDP.gene.S000074.69  | KacstDP.mRNA.S000074.69  | plant invertase/pectin methylesterase | Fruit ripening |
| KacstDP.gene.S003125.1   | KacstDP.mRNA.S003125.1   | plant invertase/pectin methylesterase | Fruit ripening |
| KacstDP.gene.S000135.26  | KacstDP.mRNA.S000135.26  | plant invertase/pectin methylesterase | Fruit ripening |
| KacstDP.gene.S000618.10  | KacstDP.mRNA.S000618.10  | plant invertase/pectin methylesterase | Fruit ripening |
| KacstDP.gene.S000183.28  | KacstDP.mRNA.S000183.28  | plant invertase/pectin methylesterase | Fruit ripening |
| KacstDP.gene.S000116.58  | KacstDP.mRNA.S000116.58  | plant invertase/pectin methylesterase | Fruit ripening |
| KacstDP.gene.S000116.5   | KacstDP.mRNA.S000116.5   | plant invertase/pectin methylesterase | Fruit ripening |
| KacstDP.gene.S000018.111 | KacstDP.mRNA.S000018.111 | plant invertase/pectin methylesterase | Fruit ripening |
| KacstDP.gene.S000002.155 | KacstDP.mRNA.S000002.155 | plant invertase/pectin methylesterase | Fruit ripening |

|                          |                          |                                       |                |
|--------------------------|--------------------------|---------------------------------------|----------------|
| KacstDP.gene.S000021.100 | KacstDP.mRNA.S000021.100 | plant invertase/pectin methylesterase | Fruit ripening |
| KacstDP.gene.S000001.192 | KacstDP.mRNA.S000001.192 | plant invertase/pectin methylesterase | Fruit ripening |
| KacstDP.gene.S000104.54  | KacstDP.mRNA.S000104.54  | plant invertase/pectin methylesterase | Fruit ripening |
| KacstDP.gene.S000028.4   | KacstDP.mRNA.S000028.4   | plant invertase/pectin methylesterase | Fruit ripening |
| KacstDP.gene.S000059.44  | KacstDP.mRNA.S000059.44  | plant invertase/pectin methylesterase | Fruit ripening |
| KacstDP.gene.S000116.4   | KacstDP.mRNA.S000116.4   | plant invertase/pectin methylesterase | Fruit ripening |
| KacstDP.gene.S000160.12  | KacstDP.mRNA.S000160.12  | plant invertase/pectin methylesterase | Fruit ripening |
| KacstDP.gene.S000036.118 | KacstDP.mRNA.S000036.118 | plant invertase/pectin methylesterase | Fruit ripening |
| KacstDP.gene.S000050.81  | KacstDP.mRNA.S000050.81  | plant invertase/pectin methylesterase | Fruit ripening |
| KacstDP.gene.S000392.14  | KacstDP.mRNA.S000392.14  | plant invertase/pectin methylesterase | Fruit ripening |
| KacstDP.gene.S000392.13  | KacstDP.mRNA.S000392.13  | plant invertase/pectin methylesterase | Fruit ripening |
| KacstDP.gene.S000027.99  | KacstDP.mRNA.S000027.99  | plant invertase/pectin methylesterase | Fruit ripening |
| KacstDP.gene.S000013.11  | KacstDP.mRNA.S000013.11  | polygalacturonase activity            | Fruit ripening |
| KacstDP.gene.S000636.12  | KacstDP.mRNA.S000636.12  | polygalacturonase activity            | Fruit ripening |
| KacstDP.gene.S000187.43  | KacstDP.mRNA.S000187.43  | polygalacturonase activity            | Fruit ripening |
| KacstDP.gene.S000026.43  | KacstDP.mRNA.S000026.43  | polygalacturonase activity            | Fruit ripening |
| KacstDP.gene.S000645.3   | KacstDP.mRNA.S000645.3   | polygalacturonase activity            | Fruit ripening |
| KacstDP.gene.S000191.2   | KacstDP.mRNA.S000191.2   | polygalacturonase activity            | Fruit ripening |
| KacstDP.gene.S001089.1   | KacstDP.mRNA.S001089.1   | polygalacturonase activity            | Fruit ripening |
| KacstDP.gene.S000561.12  | KacstDP.mRNA.S000561.12  | polygalacturonase activity            | Fruit ripening |
| KacstDP.gene.S000013.108 | KacstDP.mRNA.S000013.108 | polygalacturonase activity            | Fruit ripening |
| KacstDP.gene.S000580.16  | KacstDP.mRNA.S000580.16  | polygalacturonase activity            | Fruit ripening |
| KacstDP.gene.S000047.59  | KacstDP.mRNA.S000047.59  | polygalacturonase activity            | Fruit ripening |
| KacstDP.gene.S000758.5   | KacstDP.mRNA.S000758.5   | polygalacturonase activity            | Fruit ripening |
| KacstDP.gene.S000047.58  | KacstDP.mRNA.S000047.58  | polygalacturonase activity            | Fruit ripening |
| KacstDP.gene.S000047.57  | KacstDP.mRNA.S000047.57  | polygalacturonase activity            | Fruit ripening |
| KacstDP.gene.S000006.142 | KacstDP.mRNA.S000006.142 | polygalacturonase activity            | Fruit ripening |

|                           |                           |                                     |                |
|---------------------------|---------------------------|-------------------------------------|----------------|
| KacstDP.gene.S000358.12   | KacstDP.mRNA.S000358.12   | polygalacturonase activity          | Fruit ripening |
| KacstDP.gene.S000155.34   | KacstDP.mRNA.S000155.34   | polygalacturonase activity          | Fruit ripening |
| KacstDP.gene.S000362.5    | KacstDP.mRNA.S000362.5    | polygalacturonase activity          | Fruit ripening |
| KacstDP.gene.S000084.11   | KacstDP.mRNA.S000084.11   | polygalacturonase activity          | Fruit ripening |
| KacstDP.gene.S000476.9    | KacstDP.mRNA.S000476.9    | polygalacturonase activity          | Fruit ripening |
| KacstDP.gene.S000115.37   | KacstDP.mRNA.S000115.37   | polygalacturonase activity          | Fruit ripening |
| KacstDP.gene.S000104.22   | KacstDP.mRNA.S000104.22   | polygalacturonase activity          | Fruit ripening |
| KacstDP.gene.S000379.4    | KacstDP.mRNA.S000379.4    | polygalacturonase activity          | Fruit ripening |
| KacstDP.gene.S000047.9    | KacstDP.mRNA.S000047.9    | polygalacturonase activity          | Fruit ripening |
| KacstDP.gene.S000300.12   | KacstDP.mRNA.S000300.12   | polygalacturonase activity          | Fruit ripening |
| KacstDP.gene.S000437.5    | KacstDP.mRNA.S000437.5    | polygalacturonase activity          | Fruit ripening |
| KacstDP.gene.S000518.16   | KacstDP.mRNA.S000518.16   | polygalacturonase activity          | Fruit ripening |
| KacstDP.gene.S000001.93   | KacstDP.mRNA.S000001.93.1 | polygalacturonase activity          | Fruit ripening |
| KacstDP.gene.S000001.93   | KacstDP.mRNA.S000001.93   | polygalacturonase activity          | Fruit ripening |
| KacstDP.gene.S000521.10   | KacstDP.mRNA.S000521.10   | polygalacturonase activity          | Fruit ripening |
| KacstDP.gene.S000115.62   | KacstDP.mRNA.S000115.62   | polygalacturonase activity          | Fruit ripening |
| KacstDP.gene.S000241.25   | KacstDP.mRNA.S000241.25   | xyloglucan:xyloglucosyl transferase | Fruit ripening |
| KacstDP.gene.S000032.n418 | KacstDP.mRNA.S000032.n451 | xyloglucan:xyloglucosyl transferase | Fruit ripening |
| KacstDP.gene.S000202.21   | KacstDP.mRNA.S000202.21   | xyloglucan:xyloglucosyl transferase | Fruit ripening |
| KacstDP.gene.S000334.23   | KacstDP.mRNA.S000334.23   | xyloglucan:xyloglucosyl transferase | Fruit ripening |
| KacstDP.gene.S000227.24   | KacstDP.mRNA.S000227.24   | xyloglucan:xyloglucosyl transferase | Fruit ripening |
| KacstDP.gene.S000177.17   | KacstDP.mRNA.S000177.17   | xyloglucan:xyloglucosyl transferase | Fruit ripening |
| KacstDP.gene.S000021.133  | KacstDP.mRNA.S000021.133  | xyloglucan:xyloglucosyl transferase | Fruit ripening |
| KacstDP.gene.S000063.89   | KacstDP.mRNA.S000063.89   | xyloglucan:xyloglucosyl transferase | Fruit ripening |
| KacstDP.gene.S000164.13   | KacstDP.mRNA.S000164.13   | NA                                  | TN             |
| KacstDP.gene.S000178.12   | KacstDP.mRNA.S000178.12   | NA                                  | TN             |
| KacstDP.gene.S000004.173  | KacstDP.mRNA.S000004.173  | NA                                  | RLP            |

---

|                          |                          |    |     |
|--------------------------|--------------------------|----|-----|
| KacstDP.gene.S000312.19  | KacstDP.mRNA.S000312.19  | NA | RLP |
| KacstDP.gene.S000521.18  | KacstDP.mRNA.S000521.18  | NA | RLP |
| KacstDP.gene.S000167.23  | KacstDP.mRNA.S000167.23  | NA | RLP |
| KacstDP.gene.S015303.1   | KacstDP.mRNA.S015303.1   | NA | L   |
| KacstDP.gene.S000096.44  | KacstDP.mRNA.S000096.44  | NA | L   |
| KacstDP.gene.S000017.121 | KacstDP.mRNA.S000017.121 | NA | RLP |
| KacstDP.gene.S000153.40  | KacstDP.mRNA.S000153.40  | NA | RLP |
| KacstDP.gene.S035254.1   | KacstDP.mRNA.S035254.1   | NA | L   |
| KacstDP.gene.S000033.36  | KacstDP.mRNA.S000033.36  | NA | RLP |
| KacstDP.gene.S002109.2   | KacstDP.mRNA.S002109.2   | NA | L   |
| KacstDP.gene.S000060.20  | KacstDP.mRNA.S000060.20  | NA | RLP |
| KacstDP.gene.S000058.19  | KacstDP.mRNA.S000058.19  | NA | L   |
| KacstDP.gene.S000356.23  | KacstDP.mRNA.S000356.23  | NA | RLP |
| KacstDP.gene.S000101.44  | KacstDP.mRNA.S000101.44  | NA | RLP |
| KacstDP.gene.S000015.100 | KacstDP.mRNA.S000015.100 | NA | RLP |
| KacstDP.gene.S000040.8   | KacstDP.mRNA.S000040.8   | NA | L   |
| KacstDP.gene.S000015.149 | KacstDP.mRNA.S000015.149 | NA | RLP |
| KacstDP.gene.S001181.2   | KacstDP.mRNA.S001181.2.2 | NA | RLP |
| KacstDP.gene.S001181.2   | KacstDP.mRNA.S001181.2.3 | NA | RLP |
| KacstDP.gene.S001181.2   | KacstDP.mRNA.S001181.2   | NA | RLP |
| KacstDP.gene.S001181.2   | KacstDP.mRNA.S001181.2.1 | NA | RLP |
| KacstDP.gene.S025465.1   | KacstDP.mRNA.S025465.1   | NA | L   |
| KacstDP.gene.S020771.1   | KacstDP.mRNA.S020771.1   | NA | RLP |
| KacstDP.gene.S000011.42  | KacstDP.mRNA.S000011.42  | NA | RLP |
| KacstDP.gene.S000172.19  | KacstDP.mRNA.S000172.19  | NA | RLP |
| KacstDP.gene.S000217.4   | KacstDP.mRNA.S000217.4   | NA | RLP |
| KacstDP.gene.S000005.83  | KacstDP.mRNA.S000005.83  | NA | L   |

---

---

|                          |                          |    |     |
|--------------------------|--------------------------|----|-----|
| KacstDP.gene.S000001.n29 | KacstDP.mRNA.S000001.n32 | NA | RLP |
| KacstDP.gene.S000017.69  | KacstDP.mRNA.S000017.69  | NA | RLP |
| KacstDP.gene.S000195.17  | KacstDP.mRNA.S000195.17  | NA | L   |
| KacstDP.gene.S000131.26  | KacstDP.mRNA.S000131.26  | NA | RLP |
| KacstDP.gene.S000089.54  | KacstDP.mRNA.S000089.54  | NA | RLP |
| KacstDP.gene.S000089.18  | KacstDP.mRNA.S000089.18  | NA | L   |
| KacstDP.gene.S000002.277 | KacstDP.mRNA.S000002.277 | NA | RLP |
| KacstDP.gene.S000850.2   | KacstDP.mRNA.S000850.2   | NA | RLP |
| KacstDP.gene.S000001.335 | KacstDP.mRNA.S000001.335 | NA | RLP |
| KacstDP.gene.S007169.1   | KacstDP.mRNA.S007169.1   | NA | RLP |
| KacstDP.gene.S008113.1   | KacstDP.mRNA.S008113.1   | NA | RLP |
| KacstDP.gene.S002927.1   | KacstDP.mRNA.S002927.1   | NA | RLP |
| KacstDP.gene.S001121.2   | KacstDP.mRNA.S001121.2   | NA | RLP |
| KacstDP.gene.S000001.18  | KacstDP.mRNA.S000001.18  | NA | RLP |
| KacstDP.gene.S000262.6   | KacstDP.mRNA.S000262.6   | NA | RLP |
| KacstDP.gene.S000199.4   | KacstDP.mRNA.S000199.4   | NA | RLP |
| KacstDP.gene.S000059.58  | KacstDP.mRNA.S000059.58  | NA | L   |
| KacstDP.gene.S000190.14  | KacstDP.mRNA.S000190.14  | NA | RLP |
| KacstDP.gene.S000349.6   | KacstDP.mRNA.S000349.6   | NA | RLP |
| KacstDP.gene.S000073.71  | KacstDP.mRNA.S000073.71  | NA | RLP |
| KacstDP.gene.S000134.17  | KacstDP.mRNA.S000134.17  | NA | RLP |
| KacstDP.gene.S000129.20  | KacstDP.mRNA.S000129.20  | NA | RLP |
| KacstDP.gene.S000006.63  | KacstDP.mRNA.S000006.63  | NA | RLP |
| KacstDP.gene.S000062.29  | KacstDP.mRNA.S000062.29  | NA | RLP |
| KacstDP.gene.S000855.3   | KacstDP.mRNA.S000855.3   | NA | RLP |
| KacstDP.gene.S000128.55  | KacstDP.mRNA.S000128.55  | NA | RLP |
| KacstDP.gene.S019915.1   | KacstDP.mRNA.S019915.1   | NA | RLP |

---

---

|                            |                            |    |     |
|----------------------------|----------------------------|----|-----|
| KacstDP.gene.S000007.31    | KacstDP.mRNA.S000007.31    | NA | RLP |
| KacstDP.gene.S000096.13    | KacstDP.mRNA.S000096.13    | NA | RLP |
| KacstDP.gene.S000063.56    | KacstDP.mRNA.S000063.56    | NA | RLP |
| KacstDP.gene.S000040.3     | KacstDP.mRNA.S000040.3     | NA | RLP |
| KacstDP.gene.S000106.53    | KacstDP.mRNA.S000106.53    | NA | L   |
| KacstDP.gene.S043475.1     | KacstDP.mRNA.S043475.1     | NA | RLP |
| KacstDP.gene.S000199.11    | KacstDP.mRNA.S000199.11    | NA | RLP |
| KacstDP.gene.S000457.21    | KacstDP.mRNA.S000457.21    | NA | RLP |
| KacstDP.gene.S000199.8     | KacstDP.mRNA.S000199.8     | NA | RLP |
| KacstDP.gene.S000152.n1008 | KacstDP.mRNA.S000152.n1076 | NA | RLP |
| KacstDP.gene.S000286.12    | KacstDP.mRNA.S000286.12    | NA | RLP |
| KacstDP.gene.S000124.20    | KacstDP.mRNA.S000124.20    | NA | RLP |
| KacstDP.gene.S000222.18    | KacstDP.mRNA.S000222.18    | NA | RLP |
| KacstDP.gene.S000423.9     | KacstDP.mRNA.S000423.9     | NA | RLP |
| KacstDP.gene.S000035.103   | KacstDP.mRNA.S000035.103   | NA | L   |
| KacstDP.gene.S000025.60    | KacstDP.mRNA.S000025.60    | NA | L   |
| KacstDP.gene.S000062.63    | KacstDP.mRNA.S000062.63    | NA | RLP |
| KacstDP.gene.S000032.107   | KacstDP.mRNA.S000032.107   | NA | RLP |
| KacstDP.gene.S000212.19    | KacstDP.mRNA.S000212.19    | NA | RLP |
| KacstDP.gene.S000255.34    | KacstDP.mRNA.S000255.34    | NA | RLP |
| KacstDP.gene.S000359.6     | KacstDP.mRNA.S000359.6     | NA | RLP |
| KacstDP.gene.S014157.1     | KacstDP.mRNA.S014157.1     | NA | RLP |
| KacstDP.gene.S000630.8     | KacstDP.mRNA.S000630.8     | NA | RLP |
| KacstDP.gene.S000456.2     | KacstDP.mRNA.S000456.2     | NA | RLP |
| KacstDP.gene.S000108.21    | KacstDP.mRNA.S000108.21    | NA | RLP |
| KacstDP.gene.S023072.1     | KacstDP.mRNA.S023072.1     | NA | L   |
| KacstDP.gene.S001082.2     | KacstDP.mRNA.S001082.2     | NA | L   |

---

---

|                          |                            |    |     |
|--------------------------|----------------------------|----|-----|
| KacstDP.gene.S000199.7   | KacstDP.mRNA.S000199.7     | NA | RLP |
| KacstDP.gene.S000053.106 | KacstDP.mRNA.S000053.106   | NA | RLP |
| KacstDP.gene.S000053.105 | KacstDP.mRNA.S000053.105   | NA | RLP |
| KacstDP.gene.S000443.16  | KacstDP.mRNA.S000443.16    | NA | RLP |
| KacstDP.gene.S000199.9   | KacstDP.mRNA.S000199.9     | NA | RLP |
| KacstDP.gene.S000007.209 | KacstDP.mRNA.S000007.209   | NA | RLK |
| KacstDP.gene.S000053.116 | KacstDP.mRNA.S000053.116   | NA | RLK |
| KacstDP.gene.S000055.79  | KacstDP.mRNA.S000055.79    | NA | RLK |
| KacstDP.gene.S000133.54  | KacstDP.mRNA.S000133.54    | NA | RLK |
| KacstDP.gene.S000346.20  | KacstDP.mRNA.S000346.20    | NA | RLK |
| KacstDP.gene.S000224.2   | KacstDP.mRNA.S000224.2     | NA | RLK |
| KacstDP.gene.S000765.3   | KacstDP.mRNA.S000765.3     | NA | RLK |
| KacstDP.gene.S000270.28  | KacstDP.mRNA.S000270.28    | NA | RLK |
| KacstDP.gene.S000002.33  | KacstDP.mRNA.S000002.33    | NA | RLK |
| KacstDP.gene.S000101.28  | KacstDP.mRNA.S000101.28    | NA | RLK |
| KacstDP.gene.S000071.60  | KacstDP.mRNA.S000071.60    | NA | RLK |
| KacstDP.gene.S000261.19  | KacstDP.mRNA.S000261.19    | NA | RLK |
| KacstDP.gene.S000012.120 | KacstDP.mRNA.S000012.120   | NA | RLK |
| KacstDP.gene.S000202.43  | KacstDP.mRNA.S000202.43    | NA | RLK |
| KacstDP.gene.S000145.52  | KacstDP.mRNA.S000145.52    | NA | RLK |
| KacstDP.gene.S000015.24  | KacstDP.mRNA.S000015.24    | NA | RLK |
| KacstDP.gene.S000001.120 | KacstDP.mRNA.S000001.120   | NA | RLK |
| KacstDP.gene.S000107.7   | KacstDP.mRNA.S000107.7     | NA | RLK |
| KacstDP.gene.S000457.22  | KacstDP.mRNA.S000457.22    | NA | RLK |
| KacstDP.gene.S000162.2   | KacstDP.mRNA.S000162.2     | NA | RLK |
| KacstDP.gene.S000001.349 | KacstDP.mRNA.S000001.349.1 | NA | C   |
| KacstDP.gene.S000001.349 | KacstDP.mRNA.S000001.349.2 | NA | C   |

---



---

|                            |                            |    |     |
|----------------------------|----------------------------|----|-----|
| KacstDP.gene.S000100.7     | KacstDP.mRNA.S000100.7.1   | NA | RLK |
| KacstDP.gene.S000100.7     | KacstDP.mRNA.S000100.7     | NA | RLK |
| KacstDP.gene.S000084.64    | KacstDP.mRNA.S000084.64    | NA | RLK |
| KacstDP.gene.S000084.64    | KacstDP.mRNA.S000084.64.1  | NA | RLK |
| KacstDP.gene.S000193.37    | KacstDP.mRNA.S000193.37    | NA | C   |
| KacstDP.gene.S000056.86    | KacstDP.mRNA.S000056.86    | NA | RLK |
| KacstDP.gene.S000020.17    | KacstDP.mRNA.S000020.17    | NA | RLK |
| KacstDP.gene.S000389.18    | KacstDP.mRNA.S000389.18    | NA | RLK |
| KacstDP.gene.S000944.4     | KacstDP.mRNA.S000944.4     | NA | RLK |
| KacstDP.gene.S000009.188   | KacstDP.mRNA.S000009.188   | NA | RLK |
| KacstDP.gene.S003085.1     | KacstDP.mRNA.S003085.1     | NA | RLK |
| KacstDP.gene.S003621.1     | KacstDP.mRNA.S003621.1     | NA | RLK |
| KacstDP.gene.S000115.39    | KacstDP.mRNA.S000115.39    | NA | RLK |
| KacstDP.gene.S000173.n1047 | KacstDP.mRNA.S000173.n1116 | NA | RLK |
| KacstDP.gene.S000041.48    | KacstDP.mRNA.S000041.48    | NA | RLK |
| KacstDP.gene.S000010.43    | KacstDP.mRNA.S000010.43    | NA | RLK |
| KacstDP.gene.S000519.13    | KacstDP.mRNA.S000519.13    | NA | RLK |
| KacstDP.gene.S000183.32    | KacstDP.mRNA.S000183.32    | NA | RLK |
| KacstDP.gene.S001042.1     | KacstDP.mRNA.S001042.1     | NA | RLK |
| KacstDP.gene.S000008.169   | KacstDP.mRNA.S000008.169   | NA | RLK |
| KacstDP.gene.S000693.3     | KacstDP.mRNA.S000693.3     | NA | RLK |
| KacstDP.gene.S000259.4     | KacstDP.mRNA.S000259.4     | NA | RLK |
| KacstDP.gene.S000273.26    | KacstDP.mRNA.S000273.26    | NA | RLK |
| KacstDP.gene.S000394.5     | KacstDP.mRNA.S000394.5     | NA | RLK |
| KacstDP.gene.S000002.82    | KacstDP.mRNA.S000002.82    | NA | RLK |
| KacstDP.gene.S000243.13    | KacstDP.mRNA.S000243.13    | NA | RLK |
| KacstDP.gene.S000006.19    | KacstDP.mRNA.S000006.19    | NA | RLK |

---

---

|                           |                           |    |     |
|---------------------------|---------------------------|----|-----|
| KacstDP.gene.S000041.13   | KacstDP.mRNA.S000041.13   | NA | RLK |
| KacstDP.gene.S000469.2    | KacstDP.mRNA.S000469.2    | NA | RLK |
| KacstDP.gene.S000046.90   | KacstDP.mRNA.S000046.90   | NA | RLK |
| KacstDP.gene.S000060.21   | KacstDP.mRNA.S000060.21   | NA | RLK |
| KacstDP.gene.S000032.71   | KacstDP.mRNA.S000032.71   | NA | RLK |
| KacstDP.gene.S000047.54   | KacstDP.mRNA.S000047.54   | NA | RLK |
| KacstDP.gene.S000624.6    | KacstDP.mRNA.S000624.6    | NA | RLK |
| KacstDP.gene.S000019.94   | KacstDP.mRNA.S000019.94   | NA | RLK |
| KacstDP.gene.S000029.63   | KacstDP.mRNA.S000029.63   | NA | RLK |
| KacstDP.gene.S000237.10   | KacstDP.mRNA.S000237.10   | NA | RLK |
| KacstDP.gene.S000819.4    | KacstDP.mRNA.S000819.4    | NA | RLK |
| KacstDP.gene.S000939.1    | KacstDP.mRNA.S000939.1    | NA | RLK |
| KacstDP.gene.S000249.35   | KacstDP.mRNA.S000249.35   | NA | RLK |
| KacstDP.gene.S000181.16   | KacstDP.mRNA.S000181.16   | NA | RLK |
| KacstDP.gene.S007049.1    | KacstDP.mRNA.S007049.1    | NA | RLK |
| KacstDP.gene.S000006.141  | KacstDP.mRNA.S000006.141  | NA | RLK |
| KacstDP.gene.S000006.n122 | KacstDP.mRNA.S000006.n136 | NA | RLK |
| KacstDP.gene.S000044.30   | KacstDP.mRNA.S000044.30   | NA | RLK |
| KacstDP.gene.S000237.17   | KacstDP.mRNA.S000237.17   | NA | RLK |
| KacstDP.gene.S000429.18   | KacstDP.mRNA.S000429.18   | NA | RLK |
| KacstDP.gene.S000044.41   | KacstDP.mRNA.S000044.41   | NA | RLK |
| KacstDP.gene.S000023.113  | KacstDP.mRNA.S000023.113  | NA | RLK |
| KacstDP.gene.S000089.46   | KacstDP.mRNA.S000089.46   | NA | RLK |
| KacstDP.gene.S000006.187  | KacstDP.mRNA.S000006.187  | NA | RLK |
| KacstDP.gene.S000730.2    | KacstDP.mRNA.S000730.2    | NA | RLK |
| KacstDP.gene.S000223.1    | KacstDP.mRNA.S000223.1    | NA | RLK |
| KacstDP.gene.S000006.188  | KacstDP.mRNA.S000006.188  | NA | RLK |

---

---

|                          |                          |    |     |
|--------------------------|--------------------------|----|-----|
| KacstDP.gene.S000024.6   | KacstDP.mRNA.S000024.6   | NA | RLK |
| KacstDP.gene.S000042.30  | KacstDP.mRNA.S000042.30  | NA | RLK |
| KacstDP.gene.S000432.18  | KacstDP.mRNA.S000432.18  | NA | RLK |
| KacstDP.gene.S002703.2   | KacstDP.mRNA.S002703.2   | NA | RLK |
| KacstDP.gene.S000457.3   | KacstDP.mRNA.S000457.3   | NA | RLK |
| KacstDP.gene.S000423.2   | KacstDP.mRNA.S000423.2   | NA | RLK |
| KacstDP.gene.S000042.29  | KacstDP.mRNA.S000042.29  | NA | RLK |
| KacstDP.gene.S000110.30  | KacstDP.mRNA.S000110.30  | NA | RLK |
| KacstDP.gene.S000278.30  | KacstDP.mRNA.S000278.30  | NA | RLK |
| KacstDP.gene.S001413.3   | KacstDP.mRNA.S001413.3   | NA | RLK |
| KacstDP.gene.S000343.2   | KacstDP.mRNA.S000343.2   | NA | RLK |
| KacstDP.gene.S000019.124 | KacstDP.mRNA.S000019.124 | NA | RLK |
| KacstDP.gene.S000005.213 | KacstDP.mRNA.S000005.213 | NA | RLK |
| KacstDP.gene.S000850.3   | KacstDP.mRNA.S000850.3   | NA | RLK |
| KacstDP.gene.S000457.16  | KacstDP.mRNA.S000457.16  | NA | RLK |
| KacstDP.gene.S000034.41  | KacstDP.mRNA.S000034.41  | NA | RLK |
| KacstDP.gene.S005017.1   | KacstDP.mRNA.S005017.1   | NA | RLK |
| KacstDP.gene.S000236.13  | KacstDP.mRNA.S000236.13  | NA | RLK |
| KacstDP.gene.S000088.62  | KacstDP.mRNA.S000088.62  | NA | RLK |
| KacstDP.gene.S000088.63  | KacstDP.mRNA.S000088.63  | NA | RLK |
| KacstDP.gene.S000080.30  | KacstDP.mRNA.S000080.30  | NA | RLK |
| KacstDP.gene.S004071.1   | KacstDP.mRNA.S004071.1   | NA | RLK |
| KacstDP.gene.S000020.101 | KacstDP.mRNA.S000020.101 | NA | RLK |
| KacstDP.gene.S000058.78  | KacstDP.mRNA.S000058.78  | NA | RLK |
| KacstDP.gene.S000850.1   | KacstDP.mRNA.S000850.1   | NA | RLK |
| KacstDP.gene.S000007.130 | KacstDP.mRNA.S000007.130 | NA | RLK |
| KacstDP.gene.S000443.17  | KacstDP.mRNA.S000443.17  | NA | RLK |

---

---

|                          |                           |    |     |
|--------------------------|---------------------------|----|-----|
| KacstDP.gene.S000275.1   | KacstDP.mRNA.S000275.1    | NA | RLK |
| KacstDP.gene.S009692.1   | KacstDP.mRNA.S009692.1    | NA | RLK |
| KacstDP.gene.S000733.6   | KacstDP.mRNA.S000733.6.3  | NA | RLK |
| KacstDP.gene.S000457.2   | KacstDP.mRNA.S000457.2    | NA | RLK |
| KacstDP.gene.S000317.3   | KacstDP.mRNA.S000317.3    | NA | RLK |
| KacstDP.gene.S000112.29  | KacstDP.mRNA.S000112.29   | NA | RLK |
| KacstDP.gene.S007590.1   | KacstDP.mRNA.S007590.1    | NA | RLK |
| KacstDP.gene.S000261.8   | KacstDP.mRNA.S000261.8    | NA | RLK |
| KacstDP.gene.S000617.8   | KacstDP.mRNA.S000617.8    | NA | RLK |
| KacstDP.gene.S000060.5   | KacstDP.mRNA.S000060.5    | NA | RLK |
| KacstDP.gene.S000123.62  | KacstDP.mRNA.S000123.62   | NA | RLK |
| KacstDP.gene.S000032.82  | KacstDP.mRNA.S000032.82   | NA | RLK |
| KacstDP.gene.S000086.73  | KacstDP.mRNA.S000086.73.1 | NA | RLK |
| KacstDP.gene.S000086.73  | KacstDP.mRNA.S000086.73   | NA | RLK |
| KacstDP.gene.S000037.41  | KacstDP.mRNA.S000037.41   | NA | RLK |
| KacstDP.gene.S000037.41  | KacstDP.mRNA.S000037.41.1 | NA | RLK |
| KacstDP.gene.S000021.24  | KacstDP.mRNA.S000021.24   | NA | RLK |
| KacstDP.gene.S000001.270 | KacstDP.mRNA.S000001.270  | NA | RLK |
| KacstDP.gene.S000953.2   | KacstDP.mRNA.S000953.2    | NA | RLK |
| KacstDP.gene.S000683.8   | KacstDP.mRNA.S000683.8    | NA | RLK |
| KacstDP.gene.S000044.42  | KacstDP.mRNA.S000044.42   | NA | RLK |
| KacstDP.gene.S000019.126 | KacstDP.mRNA.S000019.126  | NA | RLK |
| KacstDP.gene.S000061.67  | KacstDP.mRNA.S000061.67   | NA | RLK |
| KacstDP.gene.S001149.2   | KacstDP.mRNA.S001149.2    | NA | RLK |
| KacstDP.gene.S000008.138 | KacstDP.mRNA.S000008.138  | NA | RLK |
| KacstDP.gene.S000002.288 | KacstDP.mRNA.S000002.288  | NA | RLK |
| KacstDP.gene.S000454.4   | KacstDP.mRNA.S000454.4    | NA | RLK |

---

---

|                          |                           |    |     |
|--------------------------|---------------------------|----|-----|
| KacstDP.gene.S000280.21  | KacstDP.mRNA.S000280.21   | NA | RLK |
| KacstDP.gene.S000451.12  | KacstDP.mRNA.S000451.12   | NA | RLK |
| KacstDP.gene.S017578.1   | KacstDP.mRNA.S017578.1    | NA | RLK |
| KacstDP.gene.S000116.10  | KacstDP.mRNA.S000116.10   | NA | RLK |
| KacstDP.gene.S000103.11  | KacstDP.mRNA.S000103.11   | NA | RLK |
| KacstDP.gene.S000067.63  | KacstDP.mRNA.S000067.63   | NA | RLK |
| KacstDP.gene.S000219.11  | KacstDP.mRNA.S000219.11   | NA | RLK |
| KacstDP.gene.S000015.142 | KacstDP.mRNA.S000015.142  | NA | RLK |
| KacstDP.gene.S000630.1   | KacstDP.mRNA.S000630.1    | NA | RLK |
| KacstDP.gene.S000045.61  | KacstDP.mRNA.S000045.61   | NA | RLK |
| KacstDP.gene.S000005.240 | KacstDP.mRNA.S000005.240  | NA | RLK |
| KacstDP.gene.S000001.12  | KacstDP.mRNA.S000001.12   | NA | RLK |
| KacstDP.gene.S000054.65  | KacstDP.mRNA.S000054.65   | NA | RLK |
| KacstDP.gene.S000113.54  | KacstDP.mRNA.S000113.54   | NA | RLK |
| KacstDP.gene.S000817.7   | KacstDP.mRNA.S000817.7    | NA | RLK |
| KacstDP.gene.S000518.4   | KacstDP.mRNA.S000518.4    | NA | RLK |
| KacstDP.gene.S000518.2   | KacstDP.mRNA.S000518.2    | NA | RLK |
| KacstDP.gene.S000126.28  | KacstDP.mRNA.S000126.28.1 | NA | RLK |
| KacstDP.gene.S000126.28  | KacstDP.mRNA.S000126.28   | NA | RLK |
| KacstDP.gene.S000624.8   | KacstDP.mRNA.S000624.8    | NA | RLK |
| KacstDP.gene.S000012.45  | KacstDP.mRNA.S000012.45   | NA | RLK |
| KacstDP.gene.S000100.59  | KacstDP.mRNA.S000100.59   | NA | RLK |
| KacstDP.gene.S000111.6   | KacstDP.mRNA.S000111.6    | NA | RLK |
| KacstDP.gene.S000707.8   | KacstDP.mRNA.S000707.8    | NA | NL  |
| KacstDP.gene.S000054.8   | KacstDP.mRNA.S000054.8    | NA | NL  |
| KacstDP.gene.S000707.5   | KacstDP.mRNA.S000707.5    | NA | N   |
| KacstDP.gene.S000940.3   | KacstDP.mRNA.S000940.3    | NA | N   |

---

---

|                          |                          |    |    |
|--------------------------|--------------------------|----|----|
| KacstDP.gene.S000083.13  | KacstDP.mRNA.S000083.13  | NA | N  |
| KacstDP.gene.S001281.3   | KacstDP.mRNA.S001281.3   | NA | N  |
| KacstDP.gene.S000121.18  | KacstDP.mRNA.S000121.18  | NA | CN |
| KacstDP.gene.S022075.1   | KacstDP.mRNA.S022075.1   | NA | N  |
| KacstDP.gene.S024301.1   | KacstDP.mRNA.S024301.1   | NA | N  |
| KacstDP.gene.S000474.11  | KacstDP.mRNA.S000474.11  | NA | N  |
| KacstDP.gene.S048247.1   | KacstDP.mRNA.S048247.1   | NA | N  |
| KacstDP.gene.S061251.1   | KacstDP.mRNA.S061251.1   | NA | N  |
| KacstDP.gene.S053495.1   | KacstDP.mRNA.S053495.1   | NA | N  |
| KacstDP.gene.S000290.23  | KacstDP.mRNA.S000290.23  | NA | N  |
| KacstDP.gene.S000025.165 | KacstDP.mRNA.S000025.165 | NA | N  |
| KacstDP.gene.S038271.1   | KacstDP.mRNA.S038271.1   | NA | N  |
| KacstDP.gene.S000268.27  | KacstDP.mRNA.S000268.27  | NA | N  |
| KacstDP.gene.S000143.27  | KacstDP.mRNA.S000143.27  | NA | N  |
| KacstDP.gene.S000143.28  | KacstDP.mRNA.S000143.28  | NA | N  |
| KacstDP.gene.S000241.20  | KacstDP.mRNA.S000241.20  | NA | CN |
| KacstDP.gene.S008522.1   | KacstDP.mRNA.S008522.1   | NA | N  |
| KacstDP.gene.S000106.46  | KacstDP.mRNA.S000106.46  | NA | CN |
| KacstDP.gene.S000268.28  | KacstDP.mRNA.S000268.28  | NA | N  |
| KacstDP.gene.S000054.9   | KacstDP.mRNA.S000054.9   | NA | CN |
| KacstDP.gene.S000026.10  | KacstDP.mRNA.S000026.10  | NA | NL |
| KacstDP.gene.S018023.1   | KacstDP.mRNA.S018023.1   | NA | N  |
| KacstDP.gene.S000054.10  | KacstDP.mRNA.S000054.10  | NA | CN |
| KacstDP.gene.S000707.7   | KacstDP.mRNA.S000707.7   | NA | N  |
| KacstDP.gene.S013153.1   | KacstDP.mRNA.S013153.1   | NA | N  |
| KacstDP.gene.S000242.1   | KacstDP.mRNA.S000242.1   | NA | CN |
| KacstDP.gene.S000808.2   | KacstDP.mRNA.S000808.2   | NA | N  |

---

---

|                         |                         |    |    |
|-------------------------|-------------------------|----|----|
| KacstDP.gene.S000427.5  | KacstDP.mRNA.S000427.5  | NA | N  |
| KacstDP.gene.S001462.3  | KacstDP.mRNA.S001462.3  | NA | N  |
| KacstDP.gene.S000241.16 | KacstDP.mRNA.S000241.16 | NA | N  |
| KacstDP.gene.S000083.10 | KacstDP.mRNA.S000083.10 | NA | NL |
| KacstDP.gene.S000411.16 | KacstDP.mRNA.S000411.16 | NA | N  |
| KacstDP.gene.S000013.89 | KacstDP.mRNA.S000013.89 | NA | CN |
| KacstDP.gene.S046239.1  | KacstDP.mRNA.S046239.1  | NA | N  |
| KacstDP.gene.S010506.1  | KacstDP.mRNA.S010506.1  | NA | N  |
| KacstDP.gene.S000351.2  | KacstDP.mRNA.S000351.2  | NA | N  |
| KacstDP.gene.S000289.10 | KacstDP.mRNA.S000289.10 | NA | N  |
| KacstDP.gene.S018174.1  | KacstDP.mRNA.S018174.1  | NA | N  |
| KacstDP.gene.S016784.1  | KacstDP.mRNA.S016784.1  | NA | N  |
| KacstDP.gene.S009701.1  | KacstDP.mRNA.S009701.1  | NA | N  |
| KacstDP.gene.S000002.69 | KacstDP.mRNA.S000002.69 | NA | N  |
| KacstDP.gene.S006308.1  | KacstDP.mRNA.S006308.1  | NA | N  |
| KacstDP.gene.S026120.1  | KacstDP.mRNA.S026120.1  | NA | N  |
| KacstDP.gene.S028264.1  | KacstDP.mRNA.S028264.1  | NA | N  |
| KacstDP.gene.S000375.6  | KacstDP.mRNA.S000375.6  | NA | CN |
| KacstDP.gene.S000003.16 | KacstDP.mRNA.S000003.16 | NA | N  |
| KacstDP.gene.S000689.1  | KacstDP.mRNA.S000689.1  | NA | N  |
| KacstDP.gene.S012316.1  | KacstDP.mRNA.S012316.1  | NA | N  |
| KacstDP.gene.S000488.10 | KacstDP.mRNA.S000488.10 | NA | N  |
| KacstDP.gene.S002110.2  | KacstDP.mRNA.S002110.2  | NA | N  |
| KacstDP.gene.S000072.19 | KacstDP.mRNA.S000072.19 | NA | NL |
| KacstDP.gene.S006035.1  | KacstDP.mRNA.S006035.1  | NA | N  |
| KacstDP.gene.S003309.1  | KacstDP.mRNA.S003309.1  | NA | CN |
| KacstDP.gene.S000263.26 | KacstDP.mRNA.S000263.26 | NA | N  |

---

---

|                          |                          |    |     |
|--------------------------|--------------------------|----|-----|
| KacstDP.gene.S005985.1   | KacstDP.mRNA.S005985.1   | NA | CN  |
| KacstDP.gene.S021056.1   | KacstDP.mRNA.S021056.1   | NA | N   |
| KacstDP.gene.S037682.1   | KacstDP.mRNA.S037682.1   | NA | N   |
| KacstDP.gene.S000064.42  | KacstDP.mRNA.S000064.42  | NA | N   |
| KacstDP.gene.S015629.1   | KacstDP.mRNA.S015629.1   | NA | CN  |
| KacstDP.gene.S000008.135 | KacstDP.mRNA.S000008.135 | NA | NL  |
| KacstDP.gene.S000003.18  | KacstDP.mRNA.S000003.18  | NA | N   |
| KacstDP.gene.S008245.1   | KacstDP.mRNA.S008245.1   | NA | CN  |
| KacstDP.gene.S000285.15  | KacstDP.mRNA.S000285.15  | NA | N   |
| KacstDP.gene.S000433.22  | KacstDP.mRNA.S000433.22  | NA | CN  |
| KacstDP.gene.S000208.1   | KacstDP.mRNA.S000208.1   | NA | N   |
| KacstDP.gene.S000133.36  | KacstDP.mRNA.S000133.36  | NA | CN  |
| KacstDP.gene.S006070.1   | KacstDP.mRNA.S006070.1   | NA | N   |
| KacstDP.gene.S000561.3   | KacstDP.mRNA.S000561.3   | NA | CN  |
| KacstDP.gene.S000208.3   | KacstDP.mRNA.S000208.3   | NA | CN  |
| KacstDP.gene.S000208.2   | KacstDP.mRNA.S000208.2   | NA | CNL |
| KacstDP.gene.S059637.1   | KacstDP.mRNA.S059637.1   | NA | N   |
| KacstDP.gene.S002837.2   | KacstDP.mRNA.S002837.2   | NA | N   |
| KacstDP.gene.S000451.6   | KacstDP.mRNA.S000451.6   | NA | N   |
| KacstDP.gene.S003701.3   | KacstDP.mRNA.S003701.3   | NA | N   |
| KacstDP.gene.S001178.1   | KacstDP.mRNA.S001178.1   | NA | N   |
| KacstDP.gene.S002378.2   | KacstDP.mRNA.S002378.2   | NA | N   |
| KacstDP.gene.S000492.8   | KacstDP.mRNA.S000492.8   | NA | N   |
| KacstDP.gene.S000474.10  | KacstDP.mRNA.S000474.10  | NA | N   |
| KacstDP.gene.S000492.7   | KacstDP.mRNA.S000492.7   | NA | N   |
| KacstDP.gene.S002837.3   | KacstDP.mRNA.S002837.3   | NA | N   |
| KacstDP.gene.S028798.1   | KacstDP.mRNA.S028798.1   | NA | L   |

---



---

|                          |                          |    |     |
|--------------------------|--------------------------|----|-----|
| KacstDP.gene.S000452.5   | KacstDP.mRNA.S000452.5   | NA | NL  |
| KacstDP.gene.S038385.1   | KacstDP.mRNA.S038385.1   | NA | L   |
| KacstDP.gene.S000433.23  | KacstDP.mRNA.S000433.23  | NA | NL  |
| KacstDP.gene.S000957.7   | KacstDP.mRNA.S000957.7   | NA | RLK |
| KacstDP.gene.S000004.176 | KacstDP.mRNA.S000004.176 | NA | RLK |
| KacstDP.gene.S000083.19  | KacstDP.mRNA.S000083.19  | NA | RLK |
| KacstDP.gene.S001009.1   | KacstDP.mRNA.S001009.1   | NA | RLP |
| KacstDP.gene.S000007.98  | KacstDP.mRNA.S000007.98  | NA | NL  |
| KacstDP.gene.S000044.39  | KacstDP.mRNA.S000044.39  | NA | RLK |
| KacstDP.gene.S007098.1   | KacstDP.mRNA.S007098.1   | NA | NL  |
| KacstDP.gene.S000036.87  | KacstDP.mRNA.S000036.87  | NA | RLK |
| KacstDP.gene.S000457.1   | KacstDP.mRNA.S000457.1   | NA | RLK |
| KacstDP.gene.S000007.103 | KacstDP.mRNA.S000007.103 | NA | NL  |
| KacstDP.gene.S000363.3   | KacstDP.mRNA.S000363.3   | NA | L   |
| KacstDP.gene.S000083.65  | KacstDP.mRNA.S000083.65  | NA | L   |
| KacstDP.gene.S000040.46  | KacstDP.mRNA.S000040.46  | NA | RLP |
| KacstDP.gene.S000224.1   | KacstDP.mRNA.S000224.1   | NA | L   |
| KacstDP.gene.S001165.6   | KacstDP.mRNA.S001165.6   | NA | RLK |
| KacstDP.gene.S000184.30  | KacstDP.mRNA.S000184.30  | NA | RLK |
| KacstDP.gene.S017896.1   | KacstDP.mRNA.S017896.1   | NA | L   |
| KacstDP.gene.S000150.4   | KacstDP.mRNA.S000150.4   | NA | L   |
| KacstDP.gene.S000011.177 | KacstDP.mRNA.S000011.177 | NA | RLK |
| KacstDP.gene.S000132.34  | KacstDP.mRNA.S000132.34  | NA | RLK |
| KacstDP.gene.S000133.35  | KacstDP.mRNA.S000133.35  | NA | NL  |
| KacstDP.gene.S007322.1   | KacstDP.mRNA.S007322.1   | NA | CNL |
| KacstDP.gene.S000082.34  | KacstDP.mRNA.S000082.34  | NA | NL  |
| KacstDP.gene.S001439.5   | KacstDP.mRNA.S001439.5   | NA | CNL |

---

---

|                         |                           |    |     |
|-------------------------|---------------------------|----|-----|
| KacstDP.gene.S000133.37 | KacstDP.mRNA.S000133.37   | NA | CNL |
| KacstDP.gene.S030460.1  | KacstDP.mRNA.S030460.1    | NA | L   |
| KacstDP.gene.S054652.1  | KacstDP.mRNA.S054652.1    | NA | L   |
| KacstDP.gene.S000056.9  | KacstDP.mRNA.S000056.9    | NA | RLP |
| KacstDP.gene.S000060.11 | KacstDP.mRNA.S000060.11   | NA | CNL |
| KacstDP.gene.S000060.13 | KacstDP.mRNA.S000060.13   | NA | CNL |
| KacstDP.gene.S000486.3  | KacstDP.mRNA.S000486.3    | NA | CNL |
| KacstDP.gene.S000073.48 | KacstDP.mRNA.S000073.48   | NA | RLP |
| KacstDP.gene.S000243.5  | KacstDP.mRNA.S000243.5    | NA | RLP |
| KacstDP.gene.S023096.1  | KacstDP.mRNA.S023096.1    | NA | L   |
| KacstDP.gene.S000169.5  | KacstDP.mRNA.S000169.5    | NA | RLK |
| KacstDP.gene.S002431.1  | KacstDP.mRNA.S002431.1    | NA | RLP |
| KacstDP.gene.S027736.1  | KacstDP.mRNA.S027736.1    | NA | L   |
| KacstDP.gene.S000222.18 | KacstDP.mRNA.S000222.18.1 | NA | RLP |
| KacstDP.gene.S000821.3  | KacstDP.mRNA.S000821.3    | NA | RLP |
| KacstDP.gene.S021363.1  | KacstDP.mRNA.S021363.1    | NA | RLP |
| KacstDP.gene.S000285.18 | KacstDP.mRNA.S000285.18   | NA | RLP |
| KacstDP.gene.S000075.11 | KacstDP.mRNA.S000075.11   | NA | RLP |
| KacstDP.gene.S000024.12 | KacstDP.mRNA.S000024.12   | NA | RLK |
| KacstDP.gene.S002141.1  | KacstDP.mRNA.S002141.1    | NA | RLK |
| KacstDP.gene.S011365.1  | KacstDP.mRNA.S011365.1    | NA | NL  |
| KacstDP.gene.S000524.10 | KacstDP.mRNA.S000524.10   | NA | RLK |
| KacstDP.gene.S000115.62 | KacstDP.mRNA.S000115.62   | NA | RLP |
| KacstDP.gene.S000262.7  | KacstDP.mRNA.S000262.7    | NA | RLP |
| KacstDP.gene.S000061.65 | KacstDP.mRNA.S000061.65   | NA | RLK |
| KacstDP.gene.S001117.1  | KacstDP.mRNA.S001117.1    | NA | NL  |
| KacstDP.gene.S001117.5  | KacstDP.mRNA.S001117.5    | NA | NL  |

---

---

|                          |                          |    |     |
|--------------------------|--------------------------|----|-----|
| KacstDP.gene.S002006.3   | KacstDP.mRNA.S002006.3   | NA | NL  |
| KacstDP.gene.S000112.79  | KacstDP.mRNA.S000112.79  | NA | L   |
| KacstDP.gene.S000130.52  | KacstDP.mRNA.S000130.52  | NA | NL  |
| KacstDP.gene.S000445.7   | KacstDP.mRNA.S000445.7   | NA | RLK |
| KacstDP.gene.S000071.50  | KacstDP.mRNA.S000071.50  | NA | RLK |
| KacstDP.gene.S000291.8   | KacstDP.mRNA.S000291.8   | NA | RLK |
| KacstDP.gene.S000138.9   | KacstDP.mRNA.S000138.9   | NA | RLK |
| KacstDP.gene.S000005.15  | KacstDP.mRNA.S000005.15  | NA | RLK |
| KacstDP.gene.S000063.75  | KacstDP.mRNA.S000063.75  | NA | RLK |
| KacstDP.gene.S002085.2   | KacstDP.mRNA.S002085.2   | NA | CNL |
| KacstDP.gene.S016199.1   | KacstDP.mRNA.S016199.1   | NA | L   |
| KacstDP.gene.S004849.1   | KacstDP.mRNA.S004849.1   | NA | RLP |
| KacstDP.gene.S000472.10  | KacstDP.mRNA.S000472.10  | NA | RLK |
| KacstDP.gene.S000002.294 | KacstDP.mRNA.S000002.294 | NA | RLK |
| KacstDP.gene.S007338.1   | KacstDP.mRNA.S007338.1   | NA | RLK |
| KacstDP.gene.S034319.1   | KacstDP.mRNA.S034319.1   | NA | L   |
| KacstDP.gene.S000003.137 | KacstDP.mRNA.S000003.137 | NA | RLK |
| KacstDP.gene.S000399.4   | KacstDP.mRNA.S000399.4   | NA | RLK |
| KacstDP.gene.S000473.1   | KacstDP.mRNA.S000473.1   | NA | RLK |
| KacstDP.gene.S000473.4   | KacstDP.mRNA.S000473.4   | NA | RLK |
| KacstDP.gene.S000826.5   | KacstDP.mRNA.S000826.5   | NA | NL  |
| KacstDP.gene.S000122.52  | KacstDP.mRNA.S000122.52  | NA | L   |
| KacstDP.gene.S001339.3   | KacstDP.mRNA.S001339.3   | NA | RLP |
| KacstDP.gene.S000279.16  | KacstDP.mRNA.S000279.16  | NA | RLK |
| KacstDP.gene.S000099.46  | KacstDP.mRNA.S000099.46  | NA | RLK |
| KacstDP.gene.S000464.11  | KacstDP.mRNA.S000464.11  | NA | NL  |
| KacstDP.gene.S000097.20  | KacstDP.mRNA.S000097.20  | NA | RLP |

---

---

|                          |                            |    |     |
|--------------------------|----------------------------|----|-----|
| KacstDP.gene.S000445.10  | KacstDP.mRNA.S000445.10    | NA | RLK |
| KacstDP.gene.S000044.43  | KacstDP.mRNA.S000044.43    | NA | RLK |
| KacstDP.gene.S008848.1   | KacstDP.mRNA.S008848.1     | NA | RLP |
| KacstDP.gene.S010147.1   | KacstDP.mRNA.S010147.1     | NA | RLP |
| KacstDP.gene.S000293.23  | KacstDP.mRNA.S000293.23    | NA | RLK |
| KacstDP.gene.S000456.3   | KacstDP.mRNA.S000456.3     | NA | RLP |
| KacstDP.gene.S000823.5   | KacstDP.mRNA.S000823.5     | NA | RLP |
| KacstDP.gene.S000018.37  | KacstDP.mRNA.S000018.37    | NA | RLP |
| KacstDP.gene.S000371.7   | KacstDP.mRNA.S000371.7     | NA | RLP |
| KacstDP.gene.S000058.18  | KacstDP.mRNA.S000058.18    | NA | RLP |
| KacstDP.gene.S000539.1   | KacstDP.mRNA.S000539.1     | NA | RLK |
| KacstDP.gene.S000224.5   | KacstDP.mRNA.S000224.5     | NA | RLK |
| KacstDP.gene.S006332.1   | KacstDP.mRNA.S006332.1     | NA | RLP |
| KacstDP.gene.S000002.n50 | KacstDP.mRNA.S000002.n56   | NA | L   |
| KacstDP.gene.S020864.1   | KacstDP.mRNA.S020864.1     | NA | NL  |
| KacstDP.gene.S000033.11  | KacstDP.mRNA.S000033.11    | NA | NL  |
| KacstDP.gene.S000208.32  | KacstDP.mRNA.S000208.32    | NA | CNL |
| KacstDP.gene.S001703.1   | KacstDP.mRNA.S001703.1     | NA | RLK |
| KacstDP.gene.S000007.100 | KacstDP.mRNA.S000007.100.1 | NA | NL  |
| KacstDP.gene.S000007.100 | KacstDP.mRNA.S000007.100   | NA | NL  |
| KacstDP.gene.S000204.6   | KacstDP.mRNA.S000204.6     | NA | RLP |
| KacstDP.gene.S000806.2   | KacstDP.mRNA.S000806.2     | NA | RLP |
| KacstDP.gene.S000664.2   | KacstDP.mRNA.S000664.2     | NA | RLK |
| KacstDP.gene.S000486.10  | KacstDP.mRNA.S000486.10    | NA | NL  |
| KacstDP.gene.S000359.2   | KacstDP.mRNA.S000359.2     | NA | RLP |
| KacstDP.gene.S001169.3   | KacstDP.mRNA.S001169.3     | NA | RLK |
| KacstDP.gene.S000199.5   | KacstDP.mRNA.S000199.5     | NA | RLK |

---

---

|                          |                          |    |     |
|--------------------------|--------------------------|----|-----|
| KacstDP.gene.S000014.12  | KacstDP.mRNA.S000014.12  | NA | RLK |
| KacstDP.gene.S015947.1   | KacstDP.mRNA.S015947.1   | NA | NL  |
| KacstDP.gene.S040735.1   | KacstDP.mRNA.S040735.1   | NA | NL  |
| KacstDP.gene.S000208.28  | KacstDP.mRNA.S000208.28  | NA | CNL |
| KacstDP.gene.S000012.46  | KacstDP.mRNA.S000012.46  | NA | RLK |
| KacstDP.gene.S000541.7   | KacstDP.mRNA.S000541.7   | NA | RLK |
| KacstDP.gene.S000199.3   | KacstDP.mRNA.S000199.3   | NA | L   |
| KacstDP.gene.S000110.29  | KacstDP.mRNA.S000110.29  | NA | RLK |
| KacstDP.gene.S000096.22  | KacstDP.mRNA.S000096.22  | NA | RLK |
| KacstDP.gene.S000407.6   | KacstDP.mRNA.S000407.6   | NA | RLK |
| KacstDP.gene.S025145.1   | KacstDP.mRNA.S025145.1   | NA | L   |
| KacstDP.gene.S006455.1   | KacstDP.mRNA.S006455.1   | NA | L   |
| KacstDP.gene.S000096.38  | KacstDP.mRNA.S000096.38  | NA | RLK |
| KacstDP.gene.S000160.20  | KacstDP.mRNA.S000160.20  | NA | RLK |
| KacstDP.gene.S000073.49  | KacstDP.mRNA.S000073.49  | NA | L   |
| KacstDP.gene.S000566.4   | KacstDP.mRNA.S000566.4   | NA | RLP |
| KacstDP.gene.S000806.1   | KacstDP.mRNA.S000806.1   | NA | RLP |
| KacstDP.gene.S000080.50  | KacstDP.mRNA.S000080.50  | NA | RLP |
| KacstDP.gene.S000273.11  | KacstDP.mRNA.S000273.11  | NA | RLK |
| KacstDP.gene.S000286.11  | KacstDP.mRNA.S000286.11  | NA | RLK |
| KacstDP.gene.S002782.1   | KacstDP.mRNA.S002782.1   | NA | NL  |
| KacstDP.gene.S000032.83  | KacstDP.mRNA.S000032.83  | NA | RLK |
| KacstDP.gene.S000923.3   | KacstDP.mRNA.S000923.3   | NA | CNL |
| KacstDP.gene.S000074.54  | KacstDP.mRNA.S000074.54  | NA | RLK |
| KacstDP.gene.S000007.137 | KacstDP.mRNA.S000007.137 | NA | CNL |
| KacstDP.gene.S017381.1   | KacstDP.mRNA.S017381.1   | NA | RLK |
| KacstDP.gene.S000457.19  | KacstDP.mRNA.S000457.19  | NA | RLK |

---

---

|                          |                          |    |     |
|--------------------------|--------------------------|----|-----|
| KacstDP.gene.S009861.1   | KacstDP.mRNA.S009861.1   | NA | RLP |
| KacstDP.gene.S000280.23  | KacstDP.mRNA.S000280.23  | NA | RLK |
| KacstDP.gene.S000280.24  | KacstDP.mRNA.S000280.24  | NA | RLK |
| KacstDP.gene.S000235.13  | KacstDP.mRNA.S000235.13  | NA | RLK |
| KacstDP.gene.S000006.16  | KacstDP.mRNA.S000006.16  | NA | L   |
| KacstDP.gene.S001182.7   | KacstDP.mRNA.S001182.7   | NA | L   |
| KacstDP.gene.S000199.10  | KacstDP.mRNA.S000199.10  | NA | RLP |
| KacstDP.gene.S000199.6   | KacstDP.mRNA.S000199.6   | NA | RLK |
| KacstDP.gene.S000350.20  | KacstDP.mRNA.S000350.20  | NA | RLK |
| KacstDP.gene.S000464.21  | KacstDP.mRNA.S000464.21  | NA | CNL |
| KacstDP.gene.S007380.1   | KacstDP.mRNA.S007380.1   | NA | CNL |
| KacstDP.gene.S000268.10  | KacstDP.mRNA.S000268.10  | NA | L   |
| KacstDP.gene.S000735.6   | KacstDP.mRNA.S000735.6   | NA | NL  |
| KacstDP.gene.S000397.11  | KacstDP.mRNA.S000397.11  | NA | RLK |
| KacstDP.gene.S020504.1   | KacstDP.mRNA.S020504.1   | NA | L   |
| KacstDP.gene.S015641.1   | KacstDP.mRNA.S015641.1   | NA | RLK |
| KacstDP.gene.S000432.12  | KacstDP.mRNA.S000432.12  | NA | RLP |
| KacstDP.gene.S000252.30  | KacstDP.mRNA.S000252.30  | NA | L   |
| KacstDP.gene.S000004.220 | KacstDP.mRNA.S000004.220 | NA | RLK |
| KacstDP.gene.S000733.6   | KacstDP.mRNA.S000733.6   | NA | RLK |
| KacstDP.gene.S000733.6   | KacstDP.mRNA.S000733.6.1 | NA | RLK |
| KacstDP.gene.S000274.17  | KacstDP.mRNA.S000274.17  | NA | RLK |
| KacstDP.gene.S011673.1   | KacstDP.mRNA.S011673.1   | NA | NL  |
| KacstDP.gene.S001716.1   | KacstDP.mRNA.S001716.1   | NA | NL  |
| KacstDP.gene.S001974.1   | KacstDP.mRNA.S001974.1   | NA | NL  |
| KacstDP.gene.S001293.1   | KacstDP.mRNA.S001293.1   | NA | NL  |
| KacstDP.gene.S013440.1   | KacstDP.mRNA.S013440.1   | NA | L   |

---

---

|                         |                            |    |     |
|-------------------------|----------------------------|----|-----|
| KacstDP.gene.S000733.6  | KacstDP.mRNA.S000733.6.2   | NA | RLK |
| KacstDP.gene.S000733.6  | KacstDP.mRNA.S000733.6.2.1 | NA | RLK |
| KacstDP.gene.S003877.1  | KacstDP.mRNA.S003877.1     | NA | L   |
| KacstDP.gene.S000808.3  | KacstDP.mRNA.S000808.3     | NA | L   |
| KacstDP.gene.S001620.2  | KacstDP.mRNA.S001620.2     | NA | NL  |
| KacstDP.gene.S017604.1  | KacstDP.mRNA.S017604.1     | NA | L   |
| KacstDP.gene.S000065.75 | KacstDP.mRNA.S000065.75    | NA | RLK |
| KacstDP.gene.S000073.69 | KacstDP.mRNA.S000073.69    | NA | L   |
| KacstDP.gene.S000602.9  | KacstDP.mRNA.S000602.9     | NA | RLK |
| KacstDP.gene.S000486.4  | KacstDP.mRNA.S000486.4     | NA | RLK |
| KacstDP.gene.S000291.2  | KacstDP.mRNA.S000291.2     | NA | NL  |
| KacstDP.gene.S000138.31 | KacstDP.mRNA.S000138.31    | NA | NL  |
| KacstDP.gene.S002174.1  | KacstDP.mRNA.S002174.1     | NA | NL  |
| KacstDP.gene.S001902.1  | KacstDP.mRNA.S001902.1     | NA | CNL |
| KacstDP.gene.S001902.3  | KacstDP.mRNA.S001902.3     | NA | NL  |
| KacstDP.gene.S000359.1  | KacstDP.mRNA.S000359.1     | NA | RLP |
| KacstDP.gene.S007981.1  | KacstDP.mRNA.S007981.1     | NA | NL  |
| KacstDP.gene.S000049.40 | KacstDP.mRNA.S000049.40    | NA | RLK |
| KacstDP.gene.S000619.5  | KacstDP.mRNA.S000619.5     | NA | RLK |
| KacstDP.gene.S000116.29 | KacstDP.mRNA.S000116.29    | NA | RLK |
| KacstDP.gene.S004663.1  | KacstDP.mRNA.S004663.1     | NA | RLK |
| KacstDP.gene.S000391.13 | KacstDP.mRNA.S000391.13    | NA | CNL |
| KacstDP.gene.S000395.24 | KacstDP.mRNA.S000395.24    | NA | RLK |
| KacstDP.gene.S036948.1  | KacstDP.mRNA.S036948.1     | NA | L   |
| KacstDP.gene.S029340.1  | KacstDP.mRNA.S029340.1     | NA | NL  |
| KacstDP.gene.S000019.62 | KacstDP.mRNA.S000019.62    | NA | RLK |
| KacstDP.gene.S000006.4  | KacstDP.mRNA.S000006.4     | NA | NL  |

---

---

|                          |                          |    |     |
|--------------------------|--------------------------|----|-----|
| KacstDP.gene.S000682.4   | KacstDP.mRNA.S000682.4   | NA | CNL |
| KacstDP.gene.S008858.1   | KacstDP.mRNA.S008858.1   | NA | RLP |
| KacstDP.gene.S000492.9   | KacstDP.mRNA.S000492.9   | NA | RLP |
| KacstDP.gene.S000005.93  | KacstDP.mRNA.S000005.93  | NA | RLP |
| KacstDP.gene.S000452.3   | KacstDP.mRNA.S000452.3   | NA | CNL |
| KacstDP.gene.S000391.19  | KacstDP.mRNA.S000391.19  | NA | NL  |
| KacstDP.gene.S001601.3   | KacstDP.mRNA.S001601.3   | NA | NL  |
| KacstDP.gene.S004708.1   | KacstDP.mRNA.S004708.1   | NA | NL  |
| KacstDP.gene.S001015.6   | KacstDP.mRNA.S001015.6   | NA | L   |
| KacstDP.gene.S000240.4   | KacstDP.mRNA.S000240.4   | NA | L   |
| KacstDP.gene.S000085.15  | KacstDP.mRNA.S000085.15  | NA | RLK |
| KacstDP.gene.S017428.1   | KacstDP.mRNA.S017428.1   | NA | L   |
| KacstDP.gene.S000488.9   | KacstDP.mRNA.S000488.9   | NA | NL  |
| KacstDP.gene.S000669.1   | KacstDP.mRNA.S000669.1   | NA | NL  |
| KacstDP.gene.S000003.153 | KacstDP.mRNA.S000003.153 | NA | NL  |
| KacstDP.gene.S000561.15  | KacstDP.mRNA.S000561.15  | NA | NL  |
| KacstDP.gene.S001304.3   | KacstDP.mRNA.S001304.3   | NA | NL  |
| KacstDP.gene.S000216.8   | KacstDP.mRNA.S000216.8   | NA | RLP |
| KacstDP.gene.S001304.5   | KacstDP.mRNA.S001304.5   | NA | NL  |
| KacstDP.gene.S000064.13  | KacstDP.mRNA.S000064.13  | NA | NL  |
| KacstDP.gene.S000036.89  | KacstDP.mRNA.S000036.89  | NA | RLK |
| KacstDP.gene.S000079.75  | KacstDP.mRNA.S000079.75  | NA | RLK |
| KacstDP.gene.S000474.2   | KacstDP.mRNA.S000474.2   | NA | NL  |
| KacstDP.gene.S000049.12  | KacstDP.mRNA.S000049.12  | NA | NL  |
| KacstDP.gene.S006592.1   | KacstDP.mRNA.S006592.1   | NA | L   |
| KacstDP.gene.S000730.5   | KacstDP.mRNA.S000730.5   | NA | RLK |
| KacstDP.gene.S000012.124 | KacstDP.mRNA.S000012.124 | NA | CNL |

---



---

|                          |                          |    |     |
|--------------------------|--------------------------|----|-----|
| KacstDP.gene.S001114.7   | KacstDP.mRNA.S001114.7   | NA | NL  |
| KacstDP.gene.S000254.19  | KacstDP.mRNA.S000254.19  | NA | NL  |
| KacstDP.gene.S000095.7   | KacstDP.mRNA.S000095.7   | NA | NL  |
| KacstDP.gene.S000049.10  | KacstDP.mRNA.S000049.10  | NA | NL  |
| KacstDP.gene.S034307.1   | KacstDP.mRNA.S034307.1   | NA | NL  |
| KacstDP.gene.S000826.2   | KacstDP.mRNA.S000826.2   | NA | NL  |
| KacstDP.gene.S000004.175 | KacstDP.mRNA.S000004.175 | NA | NL  |
| KacstDP.gene.S000026.12  | KacstDP.mRNA.S000026.12  | NA | NL  |
| KacstDP.gene.S026504.1   | KacstDP.mRNA.S026504.1   | NA | NL  |
| KacstDP.gene.S002082.1   | KacstDP.mRNA.S002082.1   | NA | NL  |
| KacstDP.gene.S001420.1   | KacstDP.mRNA.S001420.1   | NA | NL  |
| KacstDP.gene.S010979.1   | KacstDP.mRNA.S010979.1   | NA | NL  |
| KacstDP.gene.S000094.40  | KacstDP.mRNA.S000094.40  | NA | NL  |
| KacstDP.gene.S051619.1   | KacstDP.mRNA.S051619.1   | NA | NL  |
| KacstDP.gene.S001303.3   | KacstDP.mRNA.S001303.3   | NA | NL  |
| KacstDP.gene.S001875.2   | KacstDP.mRNA.S001875.2   | NA | NL  |
| KacstDP.gene.S001303.4   | KacstDP.mRNA.S001303.4   | NA | NL  |
| KacstDP.gene.S001875.3   | KacstDP.mRNA.S001875.3   | NA | NL  |
| KacstDP.gene.S000488.8   | KacstDP.mRNA.S000488.8   | NA | NL  |
| KacstDP.gene.S000033.12  | KacstDP.mRNA.S000033.12  | NA | NL  |
| KacstDP.gene.S000007.99  | KacstDP.mRNA.S000007.99  | NA | NL  |
| KacstDP.gene.S000255.31  | KacstDP.mRNA.S000255.31  | NA | NL  |
| KacstDP.gene.S000003.193 | KacstDP.mRNA.S000003.193 | NA | NL  |
| KacstDP.gene.S001303.5   | KacstDP.mRNA.S001303.5   | NA | NL  |
| KacstDP.gene.S012723.1   | KacstDP.mRNA.S012723.1   | NA | NL  |
| KacstDP.gene.S000513.3   | KacstDP.mRNA.S000513.3   | NA | CNL |
| KacstDP.gene.S001168.3   | KacstDP.mRNA.S001168.3   | NA | NL  |

---

---

|                          |                          |    |     |
|--------------------------|--------------------------|----|-----|
| KacstDP.gene.S013011.1   | KacstDP.mRNA.S013011.1   | NA | NL  |
| KacstDP.gene.S000513.4   | KacstDP.mRNA.S000513.4   | NA | NL  |
| KacstDP.gene.S001114.5   | KacstDP.mRNA.S001114.5   | NA | NL  |
| KacstDP.gene.S000140.28  | KacstDP.mRNA.S000140.28  | NA | NL  |
| KacstDP.gene.S000162.10  | KacstDP.mRNA.S000162.10  | NA | NL  |
| KacstDP.gene.S000289.8   | KacstDP.mRNA.S000289.8   | NA | CNL |
| KacstDP.gene.S002110.3   | KacstDP.mRNA.S002110.3   | NA | NL  |
| KacstDP.gene.S000521.14  | KacstDP.mRNA.S000521.14  | NA | NL  |
| KacstDP.gene.S001164.1   | KacstDP.mRNA.S001164.1   | NA | NL  |
| KacstDP.gene.S009287.1   | KacstDP.mRNA.S009287.1   | NA | NL  |
| KacstDP.gene.S000013.192 | KacstDP.mRNA.S000013.192 | NA | NL  |
| KacstDP.gene.S002428.1   | KacstDP.mRNA.S002428.1   | NA | NL  |
| KacstDP.gene.S000289.24  | KacstDP.mRNA.S000289.24  | NA | CNL |
| KacstDP.gene.S008209.1   | KacstDP.mRNA.S008209.1   | NA | NL  |
| KacstDP.gene.S000007.155 | KacstDP.mRNA.S000007.155 | NA | CNL |
| KacstDP.gene.S000290.22  | KacstDP.mRNA.S000290.22  | NA | NL  |
| KacstDP.gene.S002178.1   | KacstDP.mRNA.S002178.1   | NA | NL  |
| KacstDP.gene.S000375.7   | KacstDP.mRNA.S000375.7   | NA | NL  |
| KacstDP.gene.S000826.3   | KacstDP.mRNA.S000826.3   | NA | NL  |
| KacstDP.gene.S000890.2   | KacstDP.mRNA.S000890.2   | NA | CNL |

---
